# Supplementary material for: 2,5-Di-tert-butyl-2,5-diethylpyrrolidine-1-oxyls: Where Is a Reasonable Limit of Sterical Loading for Higher Resistance to Reduction?
Source: MDPI journal article supplement (doi:10.3390/molecules29030599), 2024-01-25

## Supporting Information

### Table of content

|                                                                                                                                                                                                                       |    |
|-----------------------------------------------------------------------------------------------------------------------------------------------------------------------------------------------------------------------|----|
| NMR Spectra .....                                                                                                                                                                                                     | 5  |
| Figure S1. <sup>1</sup> H NMR (400 MHz; CDCl <sub>3</sub> ) of 2,2-dimethylpentan-3-ol .....                                                                                                                          | 5  |
| Figure S2. <sup>1</sup> H NMR (400 MHz; CDCl <sub>3</sub> ) of 2,2-dimethylpentan-3-one .....                                                                                                                         | 5  |
| Figure S3. <sup>1</sup> H NMR (500 MHz; CDCl <sub>3</sub> ) of (2R(S),3R(S),4R(S),5S(R))-2,5-di- <i>tert</i> -butyl-3,4-bis(methoxycarbonyl)-2-ethylpyrrolidine (8) .....                                             | 6  |
| Figure S4. <sup>13</sup> C NMR (125 MHz; CDCl <sub>3</sub> ) of (2R(S),3R(S),4R(S),5S(R))-2,5-di- <i>tert</i> -butyl-3,4-bis(methoxycarbonyl)-2-ethylpyrrolidine (8) .....                                            | 6  |
| Figure S5. <sup>1</sup> H NMR (400 MHz; (CD <sub>3</sub> ) <sub>2</sub> CO; CF <sub>3</sub> COOH) of (2R(S),3R(S),4R(S),5S(R))-2,5-di- <i>tert</i> -butyl-3,4-bis(methoxycarbonyl)-2-ethylpyrrolidine (8) .....       | 7  |
| Figure S6. <sup>13</sup> C NMR (100 MHz; (CD <sub>3</sub> ) <sub>2</sub> CO; CF <sub>3</sub> COOH) of (2R(S),3R(S),4R(S),5S(R))-2,5-di- <i>tert</i> -butyl-3,4-bis(methoxycarbonyl)-2-ethylpyrrolidine (8) .....      | 7  |
| Figure S7. <sup>1</sup> H NMR (500 MHz; CDCl <sub>3</sub> ) of (2S(R),3R(S),4R(S),5R(S))-2,5-di- <i>tert</i> -butyl-3,4-bis(methoxycarbonyl)-2-ethylpyrrolidine (9) .....                                             | 8  |
| Figure S8. <sup>13</sup> C NMR (125 MHz; CDCl <sub>3</sub> ) of (2S(R),3R(S),4R(S),5R(S))-2,5-di- <i>tert</i> -butyl-3,4-bis(methoxycarbonyl)-2-ethylpyrrolidine (9) .....                                            | 8  |
| Figure S9. <sup>1</sup> H NMR (500 MHz; CDCl <sub>3</sub> ) of dimethyl 2-(1-((2,2-dimethylpentan-3-ylidene)amino)-2,2-dimethylpropyl)succinate (10) .....                                                            | 9  |
| Figure S10. <sup>13</sup> C NMR (125 MHz; CDCl <sub>3</sub> ) of dimethyl 2-(1-((2,2-dimethylpentan-3-ylidene)amino)-2,2-dimethylpropyl)succinate (10) .....                                                          | 9  |
| Figure S11. <sup>1</sup> H NMR (500 MHz; CDCl <sub>3</sub> ) of (2R(S),3R(S),4R(S),5S(R))-2,5-di- <i>tert</i> -butyl-3,4-bis(hydroxymethyl)-2-ethylpyrrolidine (11) .....                                             | 10 |
| Figure S12. <sup>13</sup> C NMR (125 MHz; CDCl <sub>3</sub> ) of (2R(S),3R(S),4R(S),5S(R))-2,5-di- <i>tert</i> -butyl-3,4-bis(hydroxymethyl)-2-ethylpyrrolidine (11) .....                                            | 10 |
| Figure S13. <sup>1</sup> H NMR (400 MHz, CDCl <sub>3</sub> ) of (2R(S),3R(S),4R(S))-2,5-di- <i>tert</i> -butyl-2-ethyl-3,4-bis(hydroxymethyl)-3,4-dihydro-2 <i>H</i> -pyrrole 1-oxide (12) .....                      | 11 |
| Figure S14. <sup>13</sup> C NMR (100 MHz, CDCl <sub>3</sub> ) of (2R(S),3R(S),4R(S))-2,5-di- <i>tert</i> -butyl-2-ethyl-3,4-bis(hydroxymethyl)-3,4-dihydro-2 <i>H</i> -pyrrole 1-oxide (12) .....                     | 11 |
| Figure S15. <sup>1</sup> H NMR (500 MHz, CDCl <sub>3</sub> ) of (2R(S),3R(S),4R(S))-2,5-di- <i>tert</i> -butyl-2-ethyl-3,4-bis(((2-methoxypropan-2-yl)oxy)methyl)-3,4-dihydro-2 <i>H</i> -pyrrole 1-oxide (14) .....  | 12 |
| Figure S16. <sup>13</sup> C NMR (125 MHz, CDCl <sub>3</sub> ) of (2R(S),3R(S),4R(S))-2,5-di- <i>tert</i> -butyl-2-ethyl-3,4-bis(((2-methoxypropan-2-yl)oxy)methyl)-3,4-dihydro-2 <i>H</i> -pyrrole 1-oxide (14) ..... | 12 |
| Figure S17. <sup>1</sup> H NMR (400 MHz; CD <sub>3</sub> OD, Zn/CF <sub>3</sub> COOH system) of (2R(S),3R(S),4R(S),5S(R))-2,2,5-triethyl-5- <i>tert</i> -butyl-3,4-bis(hydroxymethyl)-pyrrolidine-1-oxyl (1a) .....   | 13 |

|                                                                                                                                                                                                                                                            |    |
|------------------------------------------------------------------------------------------------------------------------------------------------------------------------------------------------------------------------------------------------------------|----|
| Figure S18. <sup>13</sup> C NMR (100 MHz; CD <sub>3</sub> OD, Zn/CF <sub>3</sub> COOH system) of (2R(S),3R(S),4R(S),5S(R))-2,2,5-triethyl-5- <i>tert</i> -butyl-3,4-bis(hydroxymethyl)-pyrrolidine-1-oxyl (1a) .....                                       | 13 |
| Figure S19. <sup>1</sup> H NMR (400 MHz; CDCl <sub>3</sub> ) of (1S(R),4R(S),5R(S))-2,4-di- <i>tert</i> -butyl-4-ethyl-1-propyl-3-azabicyclo[3.1.0]hex-2-ene (15) .....                                                                                    | 14 |
| Figure S20. <sup>13</sup> C NMR (100 MHz; CDCl <sub>3</sub> ) of (1S(R),4R(S),5R(S))-2,4-di- <i>tert</i> -butyl-4-ethyl-1-propyl-3-azabicyclo[3.1.0]hex-2-ene (15) .....                                                                                   | 14 |
| Figure S21. <sup>1</sup> H NMR (500 MHz; CDCl <sub>3</sub> ) of (2S(R),3R(S),4R(S))-2,5-di- <i>tert</i> -butyl-2-ethyl-3,4-bis(methoxycarbonyl)-3,4-dihydro-2H-pyrrole 1-oxide (16) .....                                                                  | 15 |
| Figure S22. <sup>13</sup> C NMR (125 MHz; CDCl <sub>3</sub> ) of (2S(R),3R(S),4R(S))-2,5-di- <i>tert</i> -butyl-2-ethyl-3,4-bis(methoxycarbonyl)-3,4-dihydro-2H-pyrrole 1-oxide (16) .....                                                                 | 15 |
| Figure S23. <sup>1</sup> H NMR (400 MHz; CDCl <sub>3</sub> ) of (2S(R),3R(S))-2,5-di- <i>tert</i> -butyl-2-ethyl-3-(methoxycarbonyl)-3,4-dihydro-2H-pyrrole 1-oxide (17) .....                                                                             | 16 |
| Figure S24. <sup>13</sup> C NMR (100 MHz; CDCl <sub>3</sub> ) of (2S(R),3R(S))-2,5-di- <i>tert</i> -butyl-2-ethyl-3-(methoxycarbonyl)-3,4-dihydro-2H-pyrrole 1-oxide (17) .....                                                                            | 16 |
| Figure S25. <sup>1</sup> H NMR (500 MHz; CDCl <sub>3</sub> ) of (2S(R),3S(R))-2,5-di- <i>tert</i> -butyl-2-ethyl-3-(methoxycarbonyl)-3,4-dihydro-2H-pyrrole 1-oxide (18) .....                                                                             | 17 |
| Figure S26. <sup>13</sup> C NMR (125 MHz; CDCl <sub>3</sub> ) of (2S(R),3S(R))-2,5-di- <i>tert</i> -butyl-2-ethyl-3-(methoxycarbonyl)-3,4-dihydro-2H-pyrrole 1-oxide (18) .....                                                                            | 17 |
| Figure S27. <sup>1</sup> H NMR (600 MHz; CDCl <sub>3</sub> ) of (2S(R),3R(S))-2,5-di- <i>tert</i> -butyl-2-ethyl-3-(hydroxymethyl)-3,4-dihydro-2H-pyrrole 1-oxide (20) .....                                                                               | 18 |
| Figure S28. <sup>13</sup> C NMR (150 MHz; CDCl <sub>3</sub> ) of (2S(R),3R(S))-2,5-di- <i>tert</i> -butyl-2-ethyl-3-(hydroxymethyl)-3,4-dihydro-2H-pyrrole 1-oxide (20) .....                                                                              | 18 |
| Figure S29. <sup>1</sup> H NMR (400 MHz; CDCl <sub>3</sub> ) of (2S(R),3S(R))-2,5-di- <i>tert</i> -butyl-2-ethyl-3-(hydroxymethyl)-3,4-dihydro-2H-pyrrole 1-oxide (21) .....                                                                               | 19 |
| Figure S30. <sup>13</sup> C NMR (125 MHz; CDCl <sub>3</sub> ) of (2S(R),3S(R))-2,5-di- <i>tert</i> -butyl-2-ethyl-3-(hydroxymethyl)-3,4-dihydro-2H-pyrrole 1-oxide (21) .....                                                                              | 19 |
| Figure S31. <sup>1</sup> H NMR (400 MHz; CD <sub>3</sub> OD, Zn/CF <sub>3</sub> COOH system) of (2S(R),3R(S))-2,5-di- <i>tert</i> -butyl-2,5-diethyl-3-(hydroxymethyl)pyrrolidin-1-oxyl (23) .....                                                         | 20 |
| Figure S32. <sup>13</sup> C NMR (75 MHz; CD <sub>3</sub> OD, Zn/CF <sub>3</sub> COOH system) of (2S(R),3R(S))-2,5-di- <i>tert</i> -butyl-2,5-diethyl-3-(hydroxymethyl)pyrrolidin-1-oxyl (23) .....                                                         | 20 |
| Figure S33. <sup>1</sup> H NMR (400 MHz; CD <sub>3</sub> OD, Zn/CF <sub>3</sub> COOH system) of ((2S(R),3R(S),5S(R))-2,5-di- <i>tert</i> -butyl-2,5-diethyl-3-(((3-(trimethylammonio)propyl)carbamoyl)oxy)methyl)pyrrolidin-1-oxyl) monoiodide (26) .....  | 21 |
| Figure S34. <sup>13</sup> C NMR (100 MHz; CD <sub>3</sub> OD, Zn/CF <sub>3</sub> COOH system) of ((2S(R),3R(S),5S(R))-2,5-di- <i>tert</i> -butyl-2,5-diethyl-3-(((3-(trimethylammonio)propyl)carbamoyl)oxy)methyl)pyrrolidin-1-oxyl) monoiodide (26) ..... | 21 |
| 2D NMR Spectra .....                                                                                                                                                                                                                                       | 22 |
| Figure S35. HMBC (400 MHz; (CD <sub>3</sub> ) <sub>2</sub> CO; CF <sub>3</sub> COOH) of (2R(S),3R(S),4R(S),5S(R))-2,5-di- <i>tert</i> -butyl-3,4-bis(methoxycarbonyl)-2-ethylpyrrolidine (8) .....                                                         | 22 |
| Figure S36. NOESY (400 MHz; (CD <sub>3</sub> ) <sub>2</sub> CO; CF <sub>3</sub> COOH) of (2R(S),3R(S),4R(S),5S(R))-2,5-di- <i>tert</i> -butyl-3,4-bis(methoxycarbonyl)-2-ethylpyrrolidine (8) .....                                                        | 22 |
| Figure S37. NOESY (600 MHz; CDCl <sub>3</sub> ) of (2S(R),3R(S),4R(S),5R(S))-2,5-di- <i>tert</i> -butyl-3,4-bis(methoxycarbonyl)-2-ethylpyrrolidine (9) .....                                                                                              | 23 |
| Figure S38. HMBC (400 MHz; CDCl <sub>3</sub> ) of (2R(S),3R(S),4R(S))-2,5-di- <i>tert</i> -butyl-2-ethyl-3,4-bis(hydroxymethyl)-3,4-dihydro-2H-pyrrole 1-oxide (12) .....                                                                                  | 23 |
| Figure S39. NOESY (400 MHz; CDCl <sub>3</sub> ) of (2R(S),3R(S),4R(S))-2,5-di- <i>tert</i> -butyl-2-ethyl-3,4-bis(hydroxymethyl)-3,4-dihydro-2H-pyrrole 1-oxide (12) .....                                                                                 | 24 |
| Figure S40. COSY (400 MHz; CDCl <sub>3</sub> ) of (1S(R),4R(S),5R(S))-2,4-di- <i>tert</i> -butyl-4-ethyl-1-propyl-3-azabicyclo[3.1.0]hex-2-ene (15) .....                                                                                                  | 24 |
| Figure S41. HSQC (400 MHz, CDCl <sub>3</sub> ) of (1S(R),4R(S),5R(S))-2,4-di- <i>tert</i> -butyl-4-ethyl-1-propyl-3-azabicyclo[3.1.0]hex-2-ene (15) .....                                                                                                  | 25 |
| Figure S42. HMBC (400 MHz, CDCl <sub>3</sub> ) of (1S(R),4R(S),5R(S))-2,4-di- <i>tert</i> -butyl-4-ethyl-1-propyl-3-azabicyclo[3.1.0]hex-2-ene (15) .....                                                                                                  | 25 |

|                                                                                                                                                                                                                                              |    |
|----------------------------------------------------------------------------------------------------------------------------------------------------------------------------------------------------------------------------------------------|----|
| Figure S43. NOESY (400 MHz, CDCl <sub>3</sub> ) of (1S(R),4R(S),5R(S))-2,4-di- <i>tert</i> -butyl-4-ethyl-1-propyl-3-azabicyclo[3.1.0]hex-2-ene (15).....                                                                                    | 26 |
| Figure S44. COSY (400 MHz; CD <sub>3</sub> OD, Zn/CF <sub>3</sub> COOH system) of ((2S(R),3R(S),5S(R))-2,5-di- <i>tert</i> -butyl-2,5-diethyl-3-(((3-(trimethylammonio)propyl)carbamoyl)oxy)methyl)pyrrolidin-1-oxyl) monoiodide (26) .....  | 26 |
| Figure S45. HSQC (400 MHz; CD <sub>3</sub> OD, Zn/CF <sub>3</sub> COOH system) of ((2S(R),3R(S),5S(R))-2,5-di- <i>tert</i> -butyl-2,5-diethyl-3-(((3-(trimethylammonio)propyl)carbamoyl)oxy)methyl)pyrrolidin-1-oxyl) monoiodide (26) .....  | 27 |
| Figure S46. HMBC (400 MHz; CD <sub>3</sub> OD, Zn/CF <sub>3</sub> COOH system) of ((2S(R),3R(S),5S(R))-2,5-di- <i>tert</i> -butyl-2,5-diethyl-3-(((3-(trimethylammonio)propyl)carbamoyl)oxy)methyl)pyrrolidin-1-oxyl) monoiodide (26) .....  | 27 |
| Figure S47. NOESY (400 MHz; CD <sub>3</sub> OD, Zn/CF <sub>3</sub> COOH system) of ((2S(R),3R(S),5S(R))-2,5-di- <i>tert</i> -butyl-2,5-diethyl-3-(((3-(trimethylammonio)propyl)carbamoyl)oxy)methyl)pyrrolidin-1-oxyl) monoiodide (26) ..... | 28 |
| Line shape analysis.....                                                                                                                                                                                                                     | 29 |
| Figure S48. Simulated spectrum for (1S(R),4R(S),5R(S))-2,4-di- <i>tert</i> -butyl-4-ethyl-1-propyl-3-azabicyclo[3.1.0]hex-2-ene (15).....                                                                                                    | 29 |
| Table S1. Parameters of spins system (1S(R),4R(S),5R(S))-2,4-di- <i>tert</i> -butyl-4-ethyl-1-propyl-3-azabicyclo[3.1.0]hex-2-ene (15).....                                                                                                  | 29 |
| Figure S49. Simulated spectrum for mono((2S(R),3R(S),5S(R))-2,5-di- <i>tert</i> -butyl-2,5-diethyl-3-(((3-(trimethylammonio)propyl)carbamoyl)oxy)methyl)pyrrolidin-1-oxyl) monoiodide (26) .....                                             | 30 |
| Table S2. Parameters of spins system for mono((2S(R),3R(S),5S(R))-2,5-di- <i>tert</i> -butyl-2,5-diethyl-3-(((3-(trimethylammonio)propyl)carbamoyl)oxy)methyl)pyrrolidin-1-oxyl) monoiodide (26).....                                        | 30 |
| IR Spectra .....                                                                                                                                                                                                                             | 31 |
| Figure S50. IR (neat) of (2R(S),3R(S),4R(S),5S(R))-2,5-di- <i>tert</i> -butyl-3,4-bis(methoxycarbonyl)-2-ethylpyrrolidine (8).....                                                                                                           | 31 |
| Figure S51. IR (neat) of (2S(R),3R(S),4R(S),5R(S))-2,5-di- <i>tert</i> -butyl-3,4-bis(methoxycarbonyl)-2-ethylpyrrolidine (9).....                                                                                                           | 31 |
| Figure S52. IR (neat) of dimethyl 2-(1-((2,2-dimethylpentan-3-ylidene)amino)-2,2-dimethylpropyl)succinate (10) .....                                                                                                                         | 31 |
| Figure S53. IR (KBr) of (2R(S),3R(S),4R(S),5S(R))-2,5-di- <i>tert</i> -butyl-3,4-bis(hydroxymethyl)-2-ethylpyrrolidine (11).....                                                                                                             | 32 |
| Figure S54. IR (KBr) of (2R(S),3R(S),4R(S))-2,5-di- <i>tert</i> -butyl-2-ethyl-3,4-bis(hydroxymethyl)-3,4-dihydro-2H-pyrrole 1-oxide (12) .....                                                                                              | 32 |
| Figure S55. IR (KBr) of 2,2,5-Triethyl-5- <i>tert</i> -butyl-3,4-bis(hydroxymethyl)-pyrrolidine-1-oxyl (1a) ..                                                                                                                               | 32 |
| Figure S56. IR(KBr) of (2R(S),3R(S),4R(S))-2,5-di- <i>tert</i> -butyl-2-ethyl-3,4-bis(((2-methoxypropan-2-yl)oxy)methyl)-3,4-dihydro-2H-pyrrole 1-oxide (14) .....                                                                           | 33 |
| Figure S57. IR (neat) of (1S(R),4R(S),5R(S))-2,4-di- <i>tert</i> -butyl-4-ethyl-1-propyl-3-azabicyclo[3.1.0]hex-2-ene (15) .....                                                                                                             | 33 |
| Figure S58. IR (neat) of (2S(R),3R(S),4R(S))-2,5-di- <i>tert</i> -butyl-2-ethyl-3,4-bis(methoxycarbonyl)-3,4-dihydro-2H-pyrrole 1-oxide (16) .....                                                                                           | 33 |
| Figure S59. IR (KBr) of (2S(R),3R(S))-2,5-di- <i>tert</i> -butyl-2-ethyl-3-(methoxycarbonyl)-3,4-dihydro-2H-pyrrole 1-oxide (17).....                                                                                                        | 34 |
| Figure S60. IR (KBr) of (2S(R),3S(R))-2,5-di- <i>tert</i> -butyl-2-ethyl-3-(methoxycarbonyl)-3,4-dihydro-2H-pyrrole 1-oxide (18).....                                                                                                        | 34 |
| Figure S61. IR (KBr) of (2S(R),3R(S))-2,5-di- <i>tert</i> -butyl-2-ethyl-3-(hydroxymethyl)-3,4-dihydro-2H-pyrrole 1-oxide (20).....                                                                                                          | 34 |
| Figure S62. IR (KBr) of (2S(R),3S(R))-2,5-di- <i>tert</i> -butyl-2-ethyl-3-(hydroxymethyl)-3,4-dihydro-2H-pyrrole 1-oxide (21).....                                                                                                          | 35 |
| Figure S63. IR (neat) of (2S(R),3R(S))-2,5-di- <i>tert</i> -butyl-2,5-diethyl-3-(hydroxymethyl)pyrrolidin-1-oxyl (23).....                                                                                                                   | 35 |
| Figure S64. IR (neat) of (2S(R),3R(S),5S(R))-2,5-di- <i>tert</i> -butyl-3-(((3-(dimethylamino)propyl)carbamoyl)oxy)methyl)-2,5-diethylpyrrolidin-1-oxyl (25).....                                                                            | 35 |

|                                                                                                                                                                                        |    |
|----------------------------------------------------------------------------------------------------------------------------------------------------------------------------------------|----|
| Figure S65. IR (neat) of mono((2S(R),3R(S),5S(R))-2,5-di- <i>tert</i> -butyl-2,5-diethyl-3-(((3-(trimethylammonio)propyl)carbamoyl)oxy)methyl)pyrrolidin-1-oxyl) monoiodide (26) ..... | 36 |
| XRD Data .....                                                                                                                                                                         | 37 |
| Figure S66. Crystal structure for (2S(R),3R(S))-2,5-di- <i>tert</i> -butyl-2-ethyl-3-(hydroxymethyl)-3,4-dihydro-2H-pyrrole 1-oxide (20) .....                                         | 37 |
| Figure S67. Crystal structure for (2S(R),3S(R))-2,5-di- <i>tert</i> -butyl-2-ethyl-3-(hydroxymethyl)-3,4-dihydro-2H-pyrrole 1-oxide (21) .....                                         | 37 |
| EPR Data .....                                                                                                                                                                         | 38 |
| Figure S68. Reduction profiles of 1a (0.2 mM) in anaerobic conditions in phosphate-citrate-borate buffer (5 mM, pH 7.4) in presence of GSH (5 mM) and ascorbate .....                  | 38 |
| Figure S69. The plot of the nitroxide 1a first order decay constant $k_1$ versus ascorbate concentration and the linear fit .....                                                      | 38 |
| Figure S70. EPR spectrum of 26 (0.2 mM) in phosphate-citrate-borate buffer (5 mM, pH 7.4). .....                                                                                       | 39 |
| Figure S71. Reduction profiles of 26 (0.2 mM) in anaerobic conditions in phosphate-citrate-borate buffer (5 mM, pH 7.4) in presence of GSH (5 mM) and ascorbate .....                  | 39 |
| Figure S72. The plot of the nitroxide 26 first order decay constant $k_1$ versus ascorbate concentration and the linear fit.....                                                       | 40 |

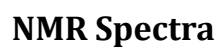

**Figure S3.**  $^1\text{H}$  NMR (500 MHz;  $\text{CDCl}_3$ ) of (2R(S),3R(S),4R(S),5S(R))-2,5-di-*tert*-butyl-3,4-bis(methoxycarbonyl)-2-ethylpyrrolidine (**8**)

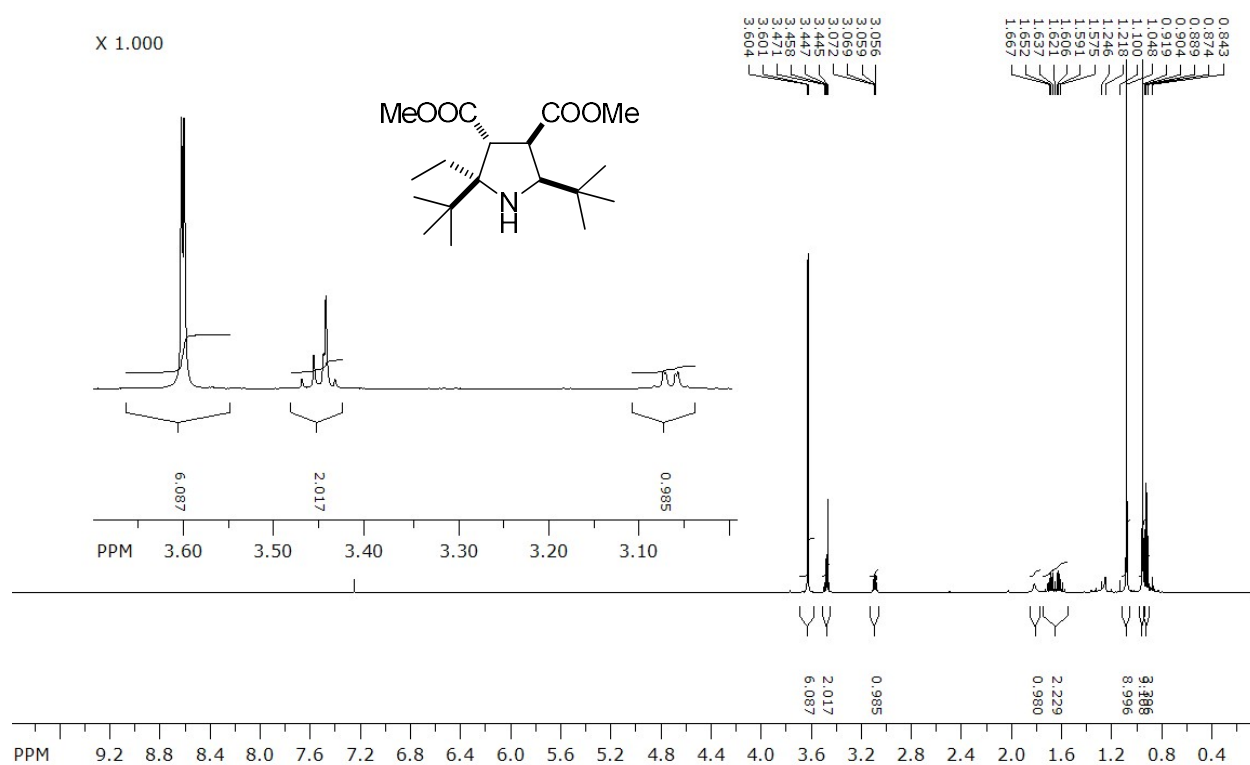

**Figure S4.**  $^{13}\text{C}$  NMR (125 MHz;  $\text{CDCl}_3$ ) of (2R(S),3R(S),4R(S),5S(R))-2,5-di-*tert*-butyl-3,4-bis(methoxycarbonyl)-2-ethylpyrrolidine (**8**)

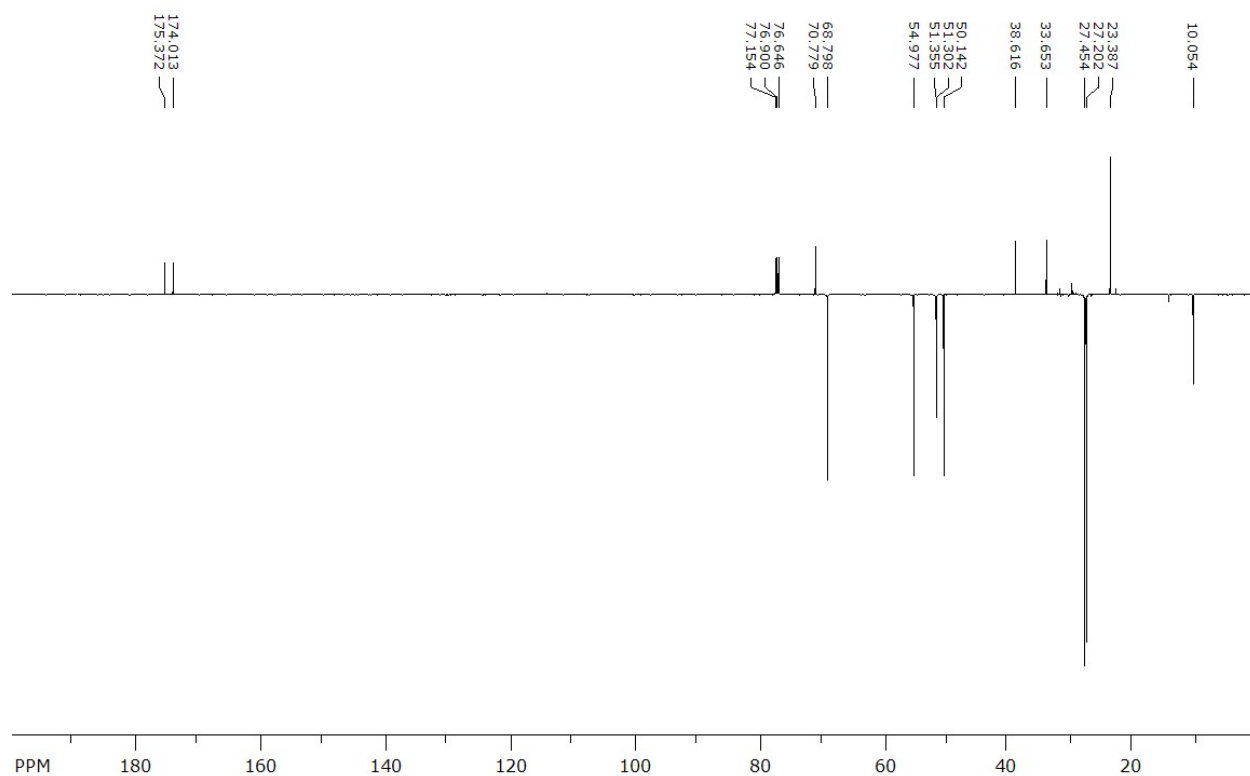

**Figure S5.**  $^1\text{H}$  NMR (400 MHz;  $(\text{CD}_3)_2\text{CO}$ ;  $\text{CF}_3\text{COOH}$ ) of (2R(S),3R(S),4R(S),5S(R))-2,5-di-*tert*-butyl-3,4-bis(methoxycarbonyl)-2-ethylpyrrolidine (**8**)

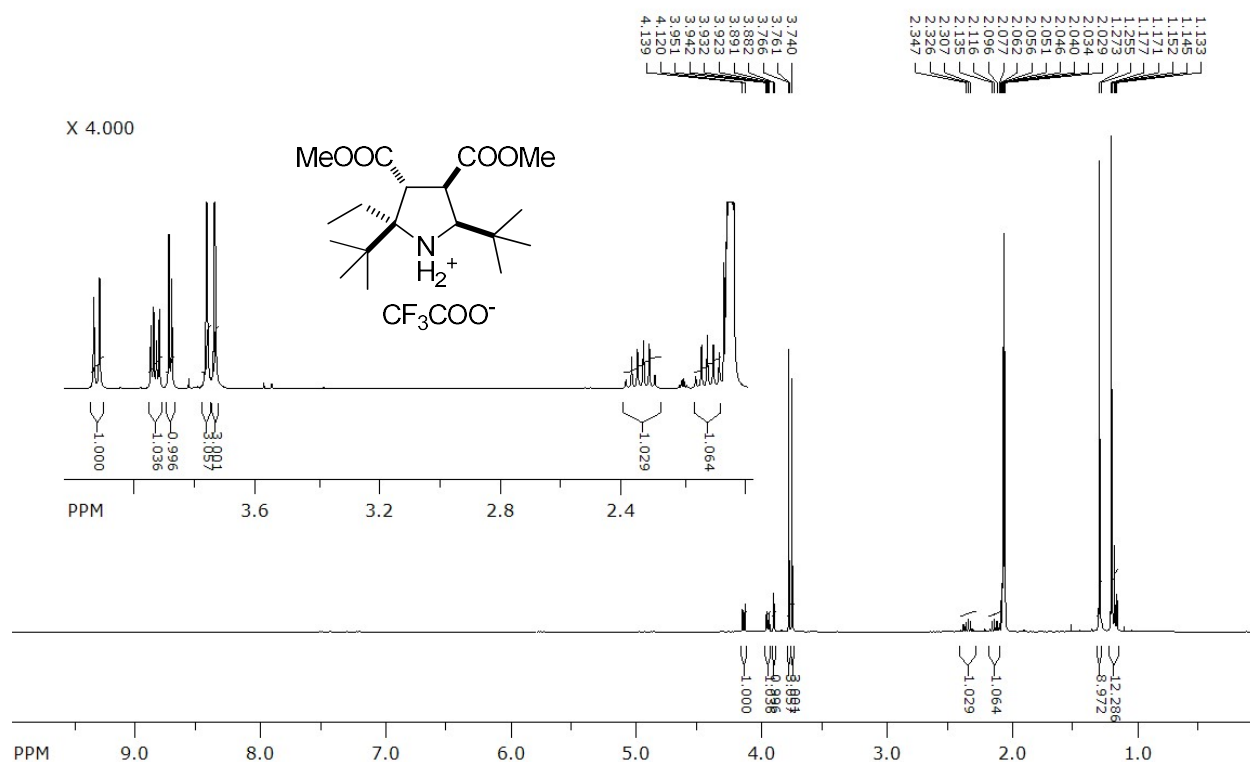

**Figure S6.**  $^{13}\text{C}$  NMR (100 MHz;  $(\text{CD}_3)_2\text{CO}$ ;  $\text{CF}_3\text{COOH}$ ) of (2R(S),3R(S),4R(S),5S(R))-2,5-di-tert-butyl-3,4-bis(methoxycarbonyl)-2-ethylpyrrolidine (**8**)

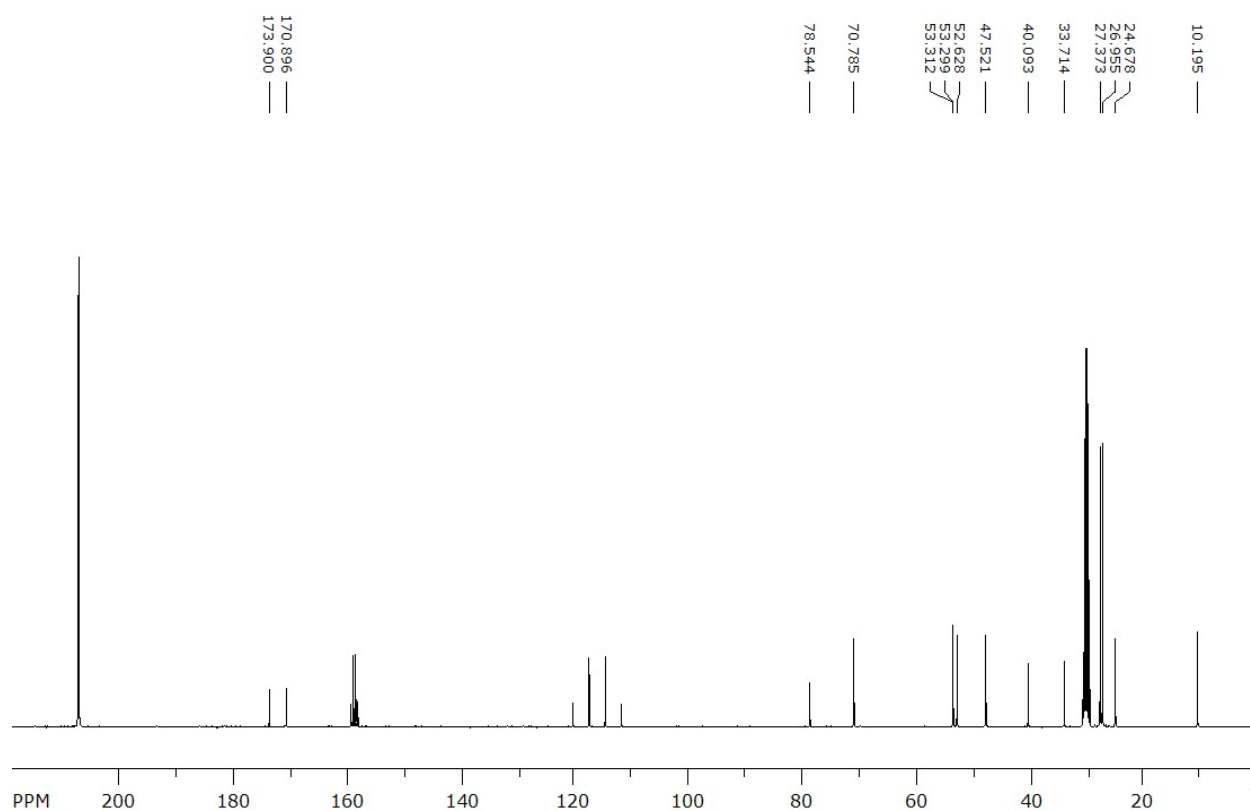

**Figure S7.**  $^1\text{H}$  NMR (500 MHz;  $\text{CDCl}_3$ ) of (2S(R),3R(S),4R(S),5R(S))-2,5-di-*tert*-butyl-3,4-bis(methoxycarbonyl)-2-ethylpyrrolidine (**9**)

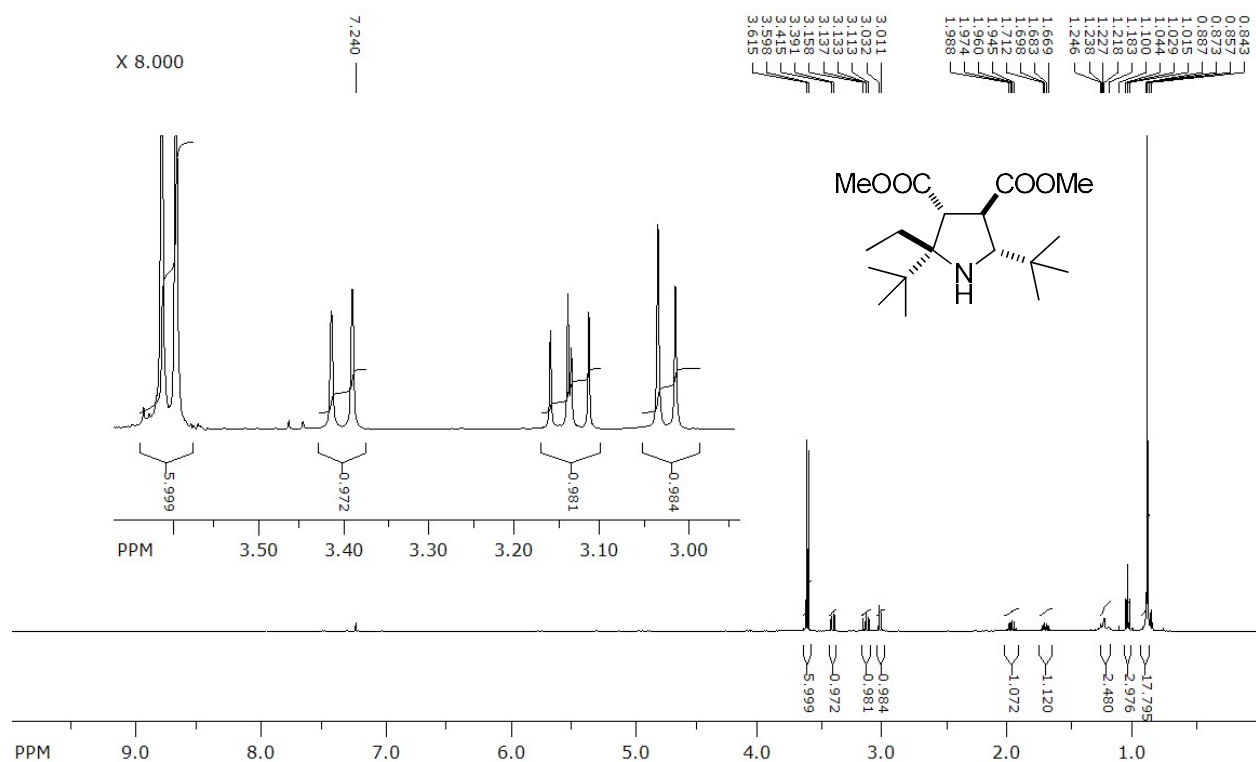

**Figure S8.**  $^{13}\text{C}$  NMR (125 MHz;  $\text{CDCl}_3$ ) of (2S(R),3R(S),4R(S),5R(S))-2,5-di-*tert*-butyl-3,4-bis(methoxycarbonyl)-2-ethylpyrrolidine (**9**)

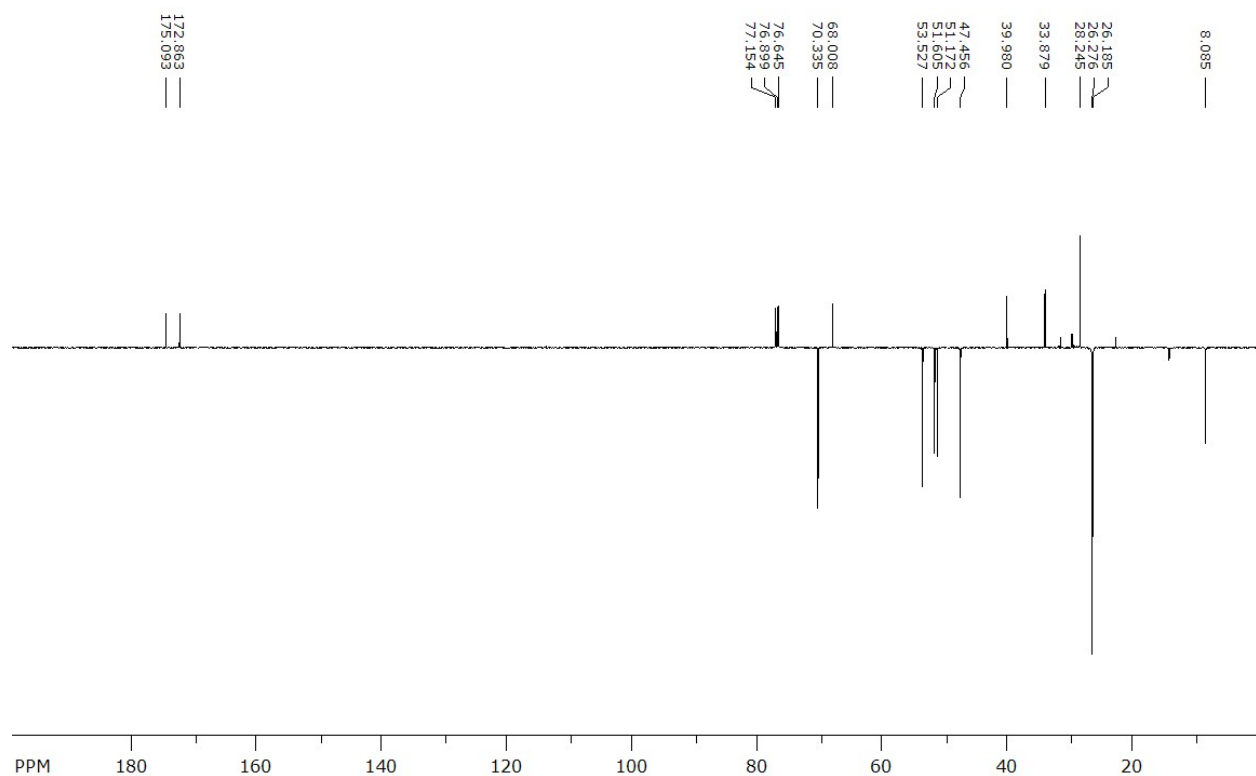







**Figure S13.**  $^1\text{H}$  NMR (400 MHz,  $\text{CDCl}_3$ ) of (2R(S),3R(S),4R(S))-2,5-di-*tert*-butyl-2-ethyl-3,4-bis(hydroxymethyl)-3,4-dihydro-2H-pyrrole 1-oxide (**12**)

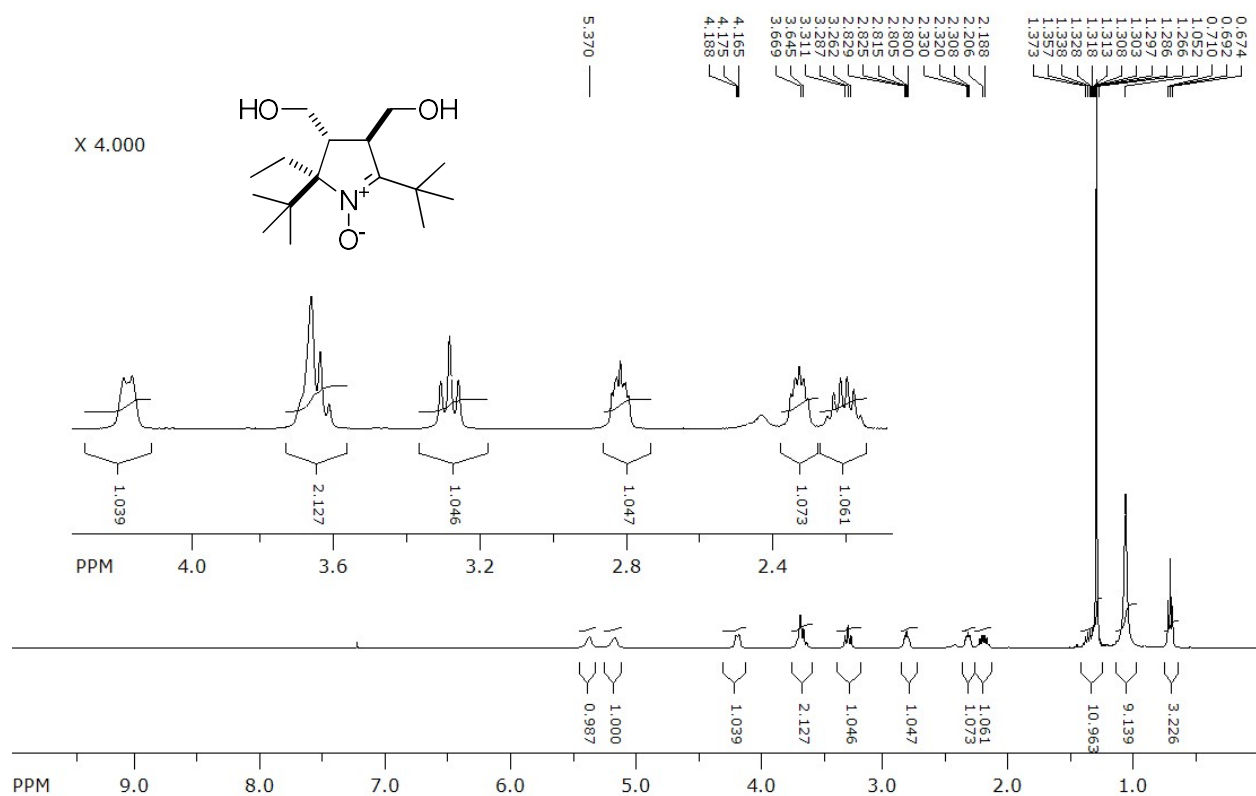

**Figure S14.**  $^{13}\text{C}$  NMR (100 MHz,  $\text{CDCl}_3$ ) of (2R(S),3R(S),4R(S))-2,5-di-*tert*-butyl-2-ethyl-3,4-bis(hydroxymethyl)-3,4-dihydro-2H-pyrrole 1-oxide (**12**)

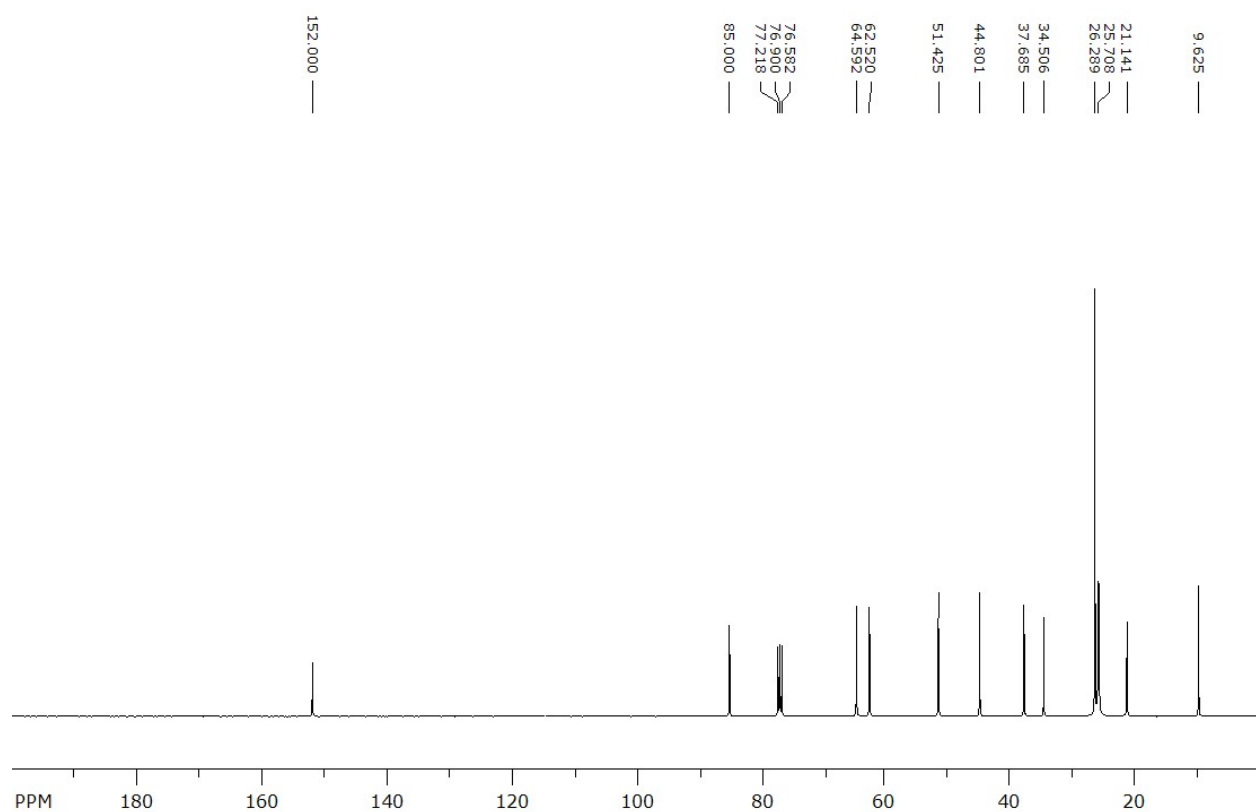

**Figure S15.**  $^1\text{H}$  NMR (500 MHz,  $\text{CDCl}_3$ ) of (2R(S),3R(S),4R(S))-2,5-di-*tert*-butyl-2-ethyl-3,4-bis(((2-methoxypropan-2-yl)oxy)methyl)-3,4-dihydro-2*H*-pyrrole 1-oxide (**14**)

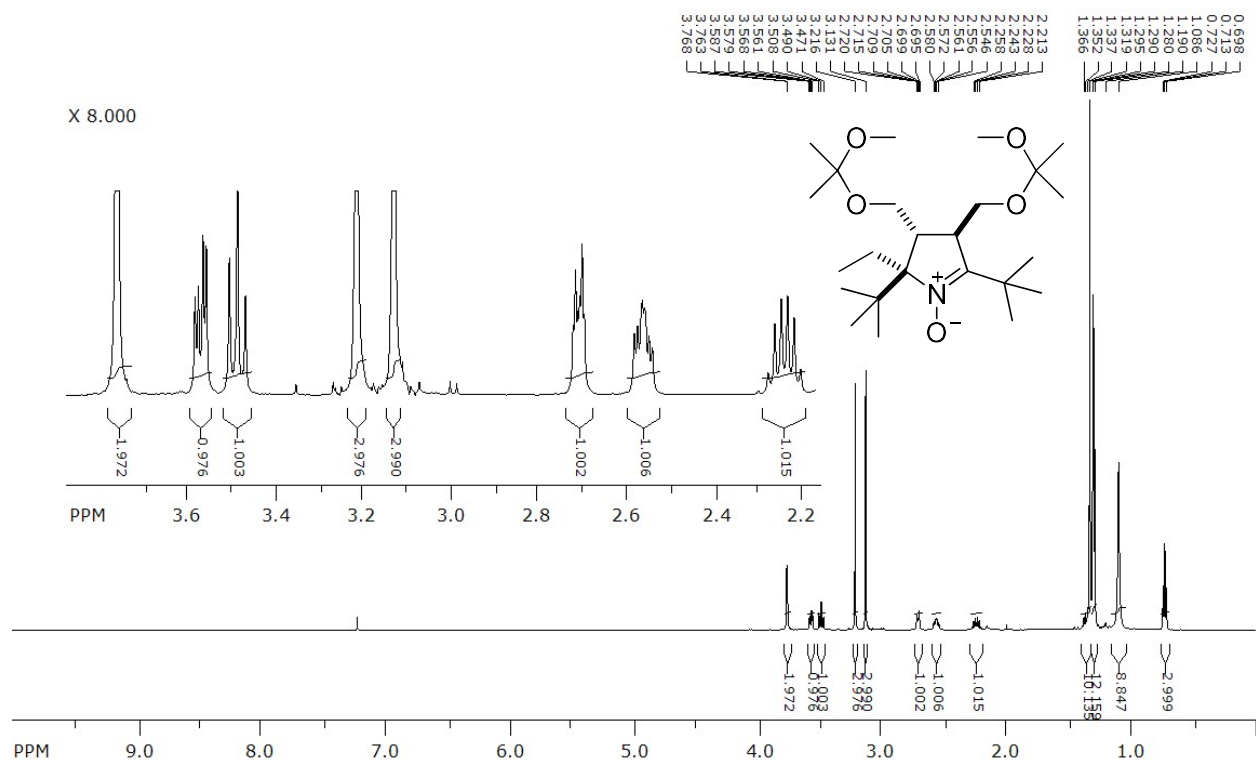

**Figure S16.**  $^{13}\text{C}$  NMR (125 MHz,  $\text{CDCl}_3$ ) of (2R(S),3R(S),4R(S))-2,5-di-*tert*-butyl-2-ethyl-3,4-bis(((2-methoxypropan-2-yl)oxy)methyl)-3,4-dihydro-2*H*-pyrrole 1-oxide (**14**)

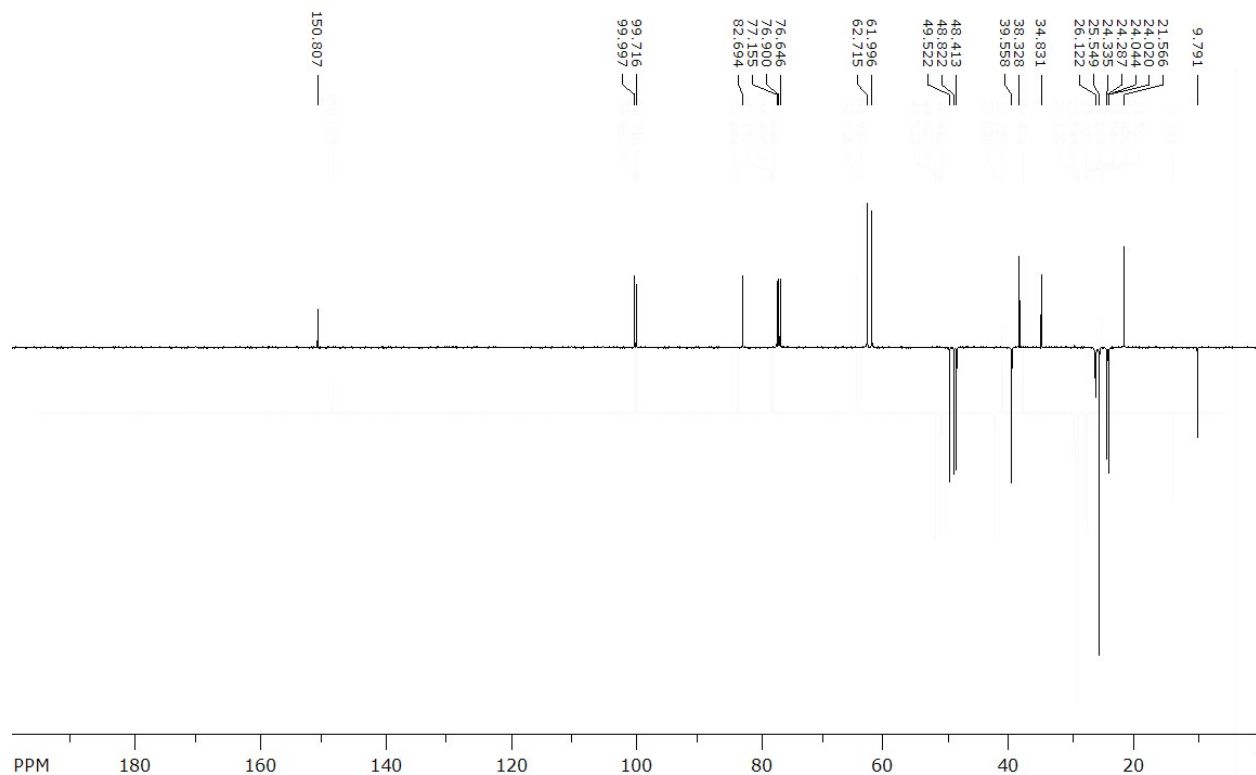

**Figure S17.**  $^1\text{H}$  NMR (400 MHz;  $\text{CD}_3\text{OD}$ ,  $\text{Zn}/\text{CF}_3\text{COOH}$  system) of (2R(S),3R(S),4R(S),5S(R))-2,2,5-triethyl-5-*tert*-butyl-3,4-bis(hydroxymethyl)-pyrrolidine-1-oxyl

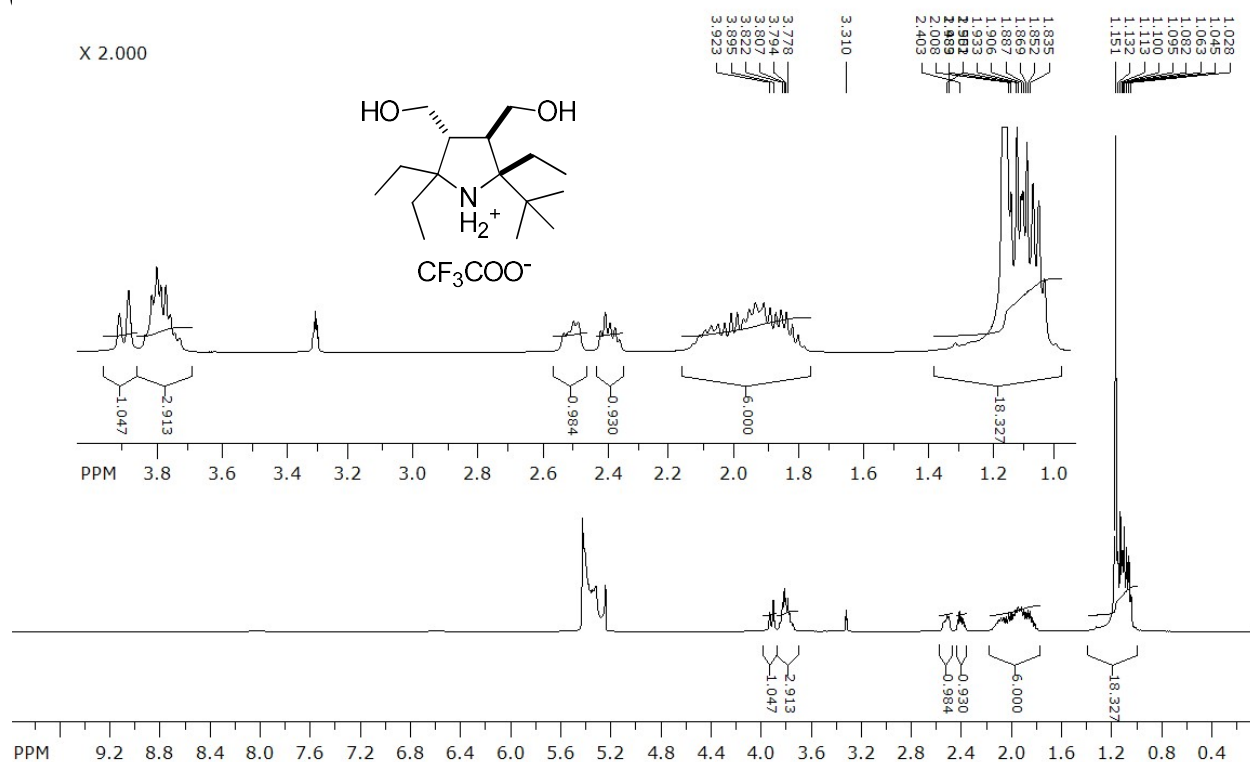

**Figure S18.**  $^{13}\text{C}$  NMR (100 MHz;  $\text{CD}_3\text{OD}$ ,  $\text{Zn}/\text{CF}_3\text{COOH}$  system) of (2R(S),3R(S),4R(S),5S(R))-2,2,5-triethyl-5-*tert*-butyl-3,4-bis(hydroxymethyl)-pyrrolidine-1-oxyl

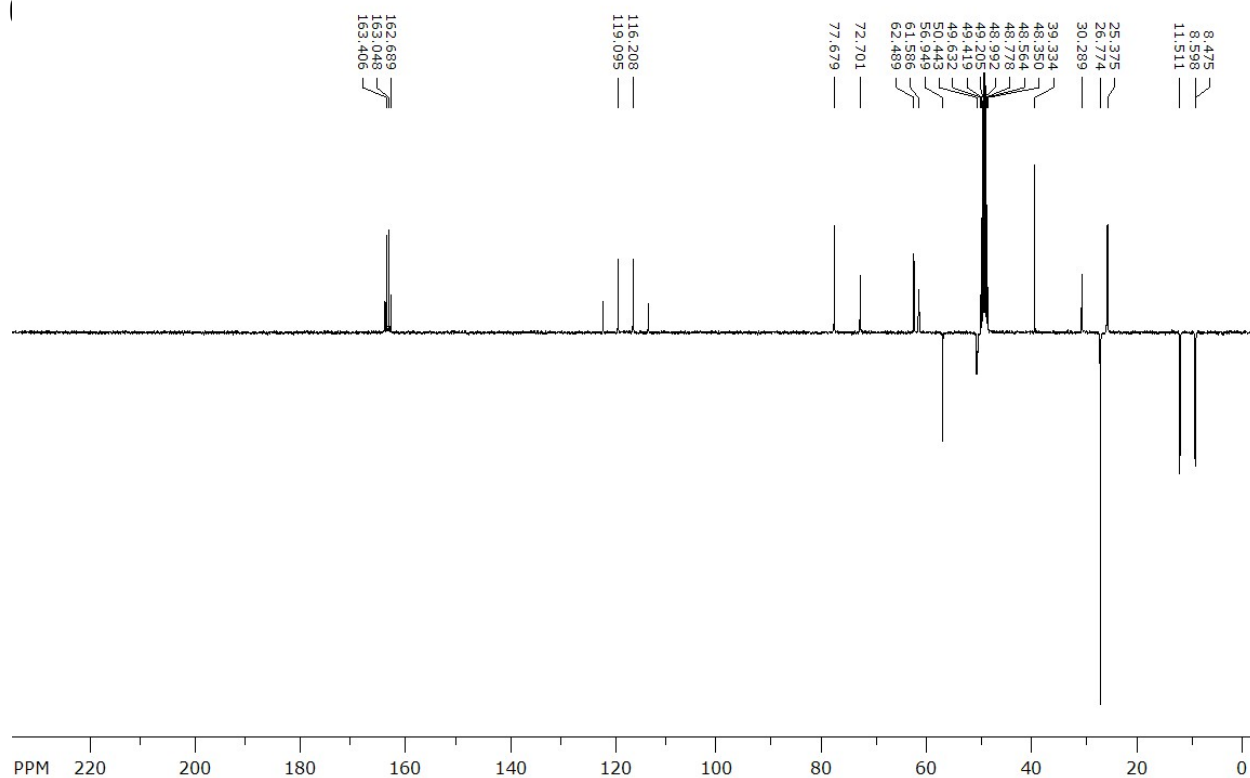

**Figure S19.**  $^1\text{H}$  NMR (400 MHz;  $\text{CDCl}_3$ ) of (1S(R),4R(S),5R(S))-2,4-di-*tert*-butyl-4-ethyl-1-propyl-3-azabicyclo[3.1.0]hex-2-ene (**15**)

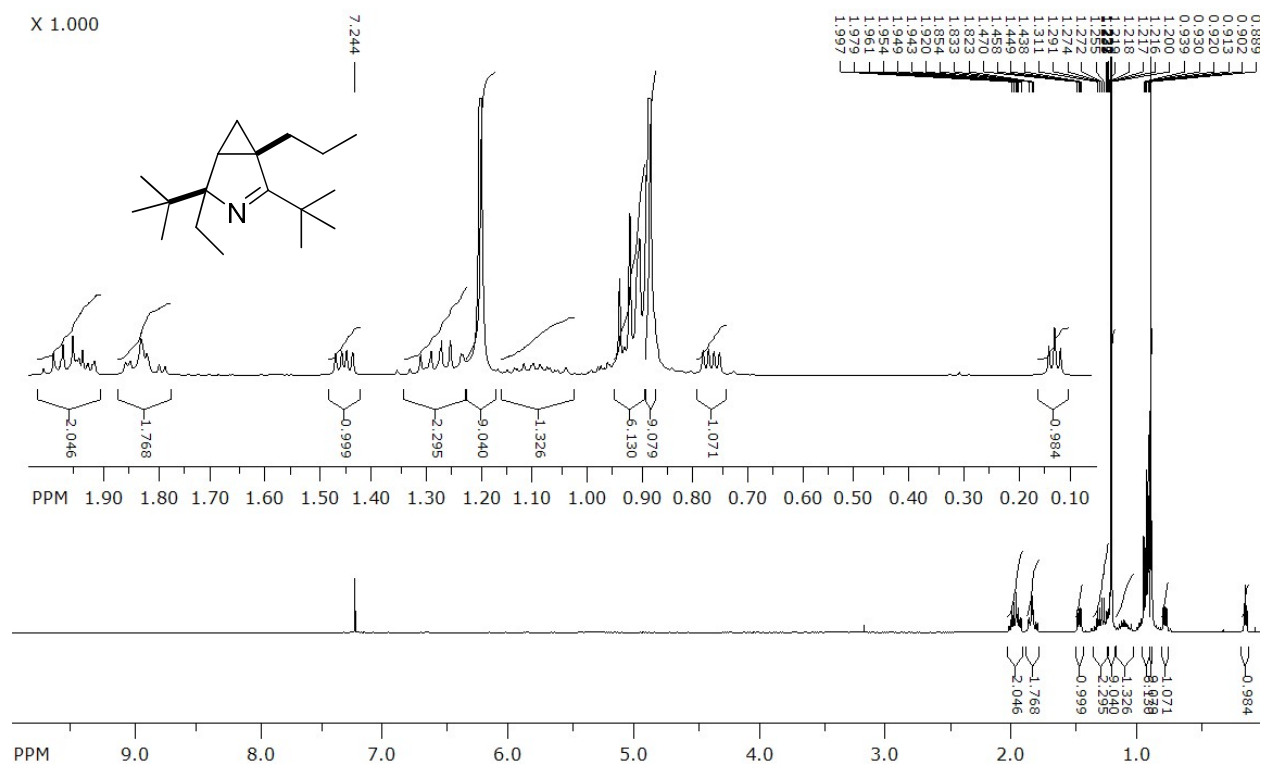

**Figure S20.**  $^{13}\text{C}$  NMR (100 MHz;  $\text{CDCl}_3$ ) of (1S(R),4R(S),5R(S))-2,4-di-*tert*-butyl-4-ethyl-1-propyl-3-azabicyclo[3.1.0]hex-2-ene (**15**)

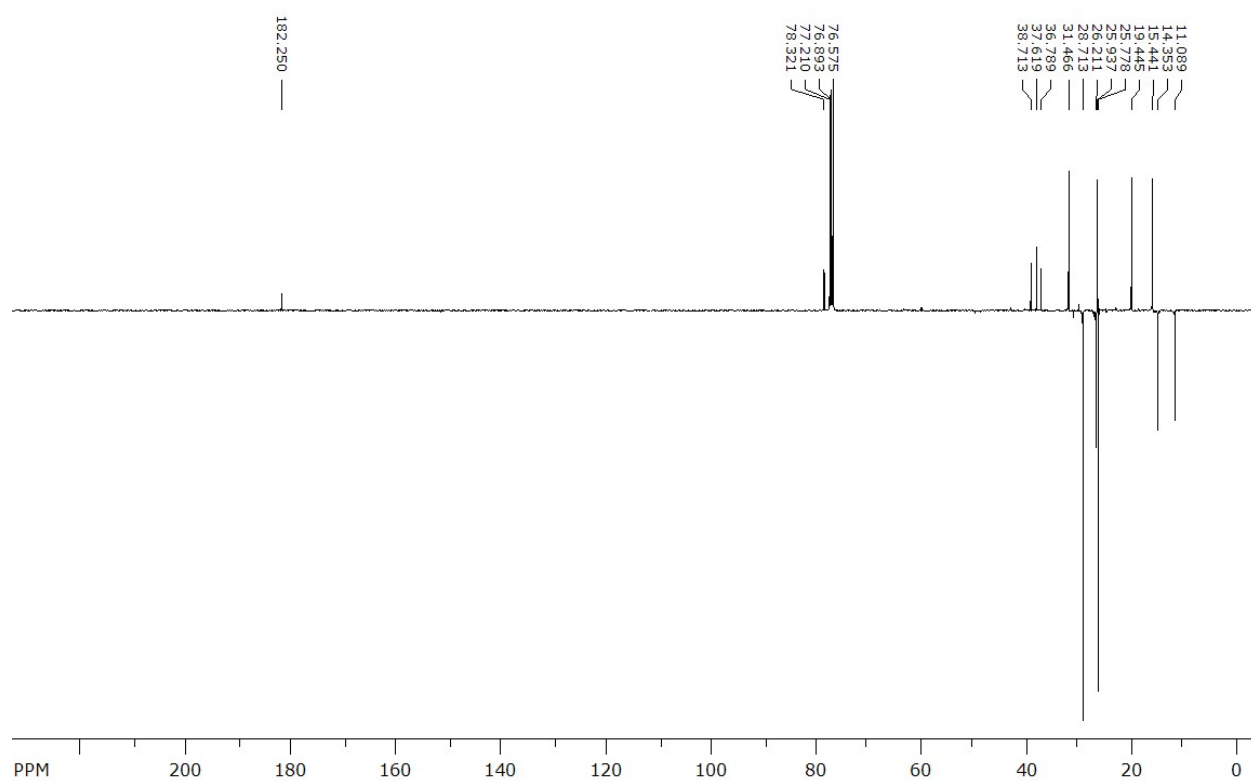



**Figure S23.**  $^1\text{H}$  NMR (400 MHz;  $\text{CDCl}_3$ ) of (2S(R),3R(S))-2,5-di-*tert*-butyl-2-ethyl-3-(methoxycarbonyl)-3,4-dihydro-2H-pyrrole 1-oxide (**17**)

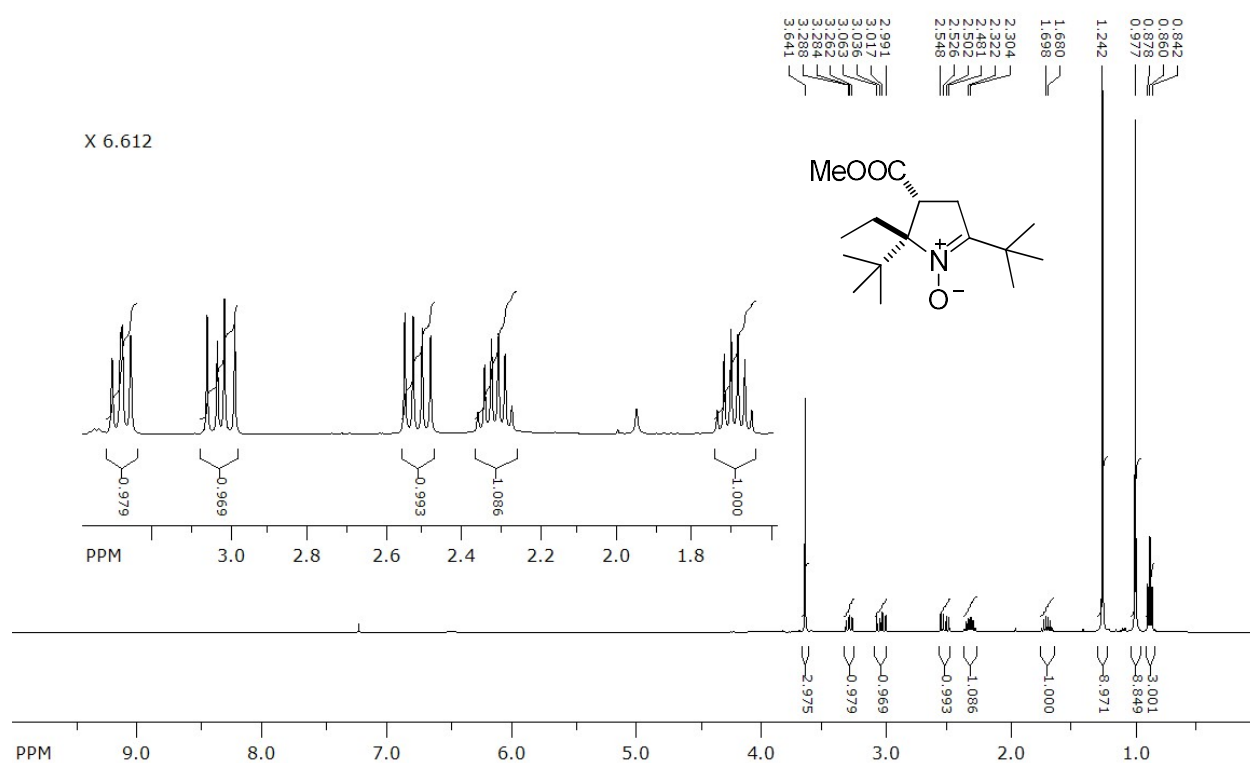

**Figure S24.**  $^{13}\text{C}$  NMR (100 MHz;  $\text{CDCl}_3$ ) of (2S(R),3R(S))-2,5-di-*tert*-butyl-2-ethyl-3-(methoxycarbonyl)-3,4-dihydro-2H-pyrrole 1-oxide (**17**)

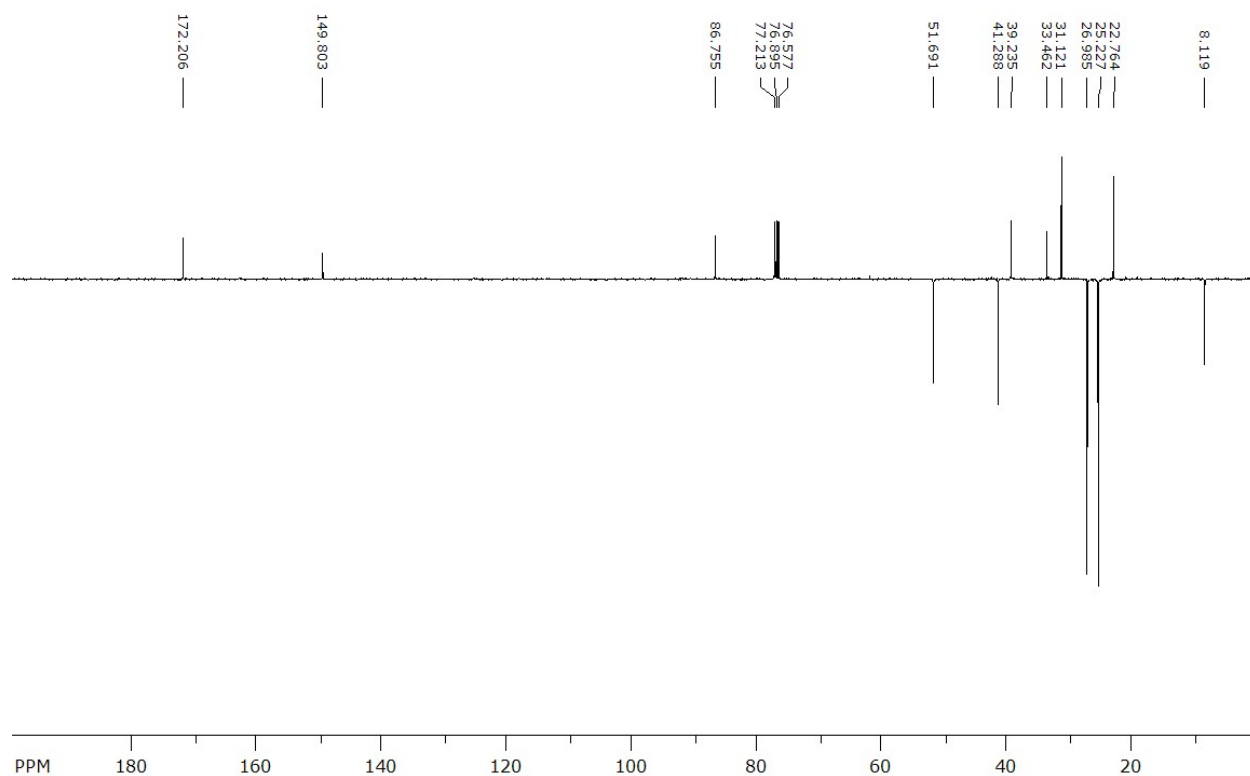



**Figure S25.**  $^1\text{H}$  NMR (500 MHz;  $\text{CDCl}_3$ ) of (2S(R),3S(R))-2,5-di-*tert*-butyl-2-ethyl-3-(methoxycarbonyl)-3,4-dihydro-2H-pyrrole 1-oxide (**18**)

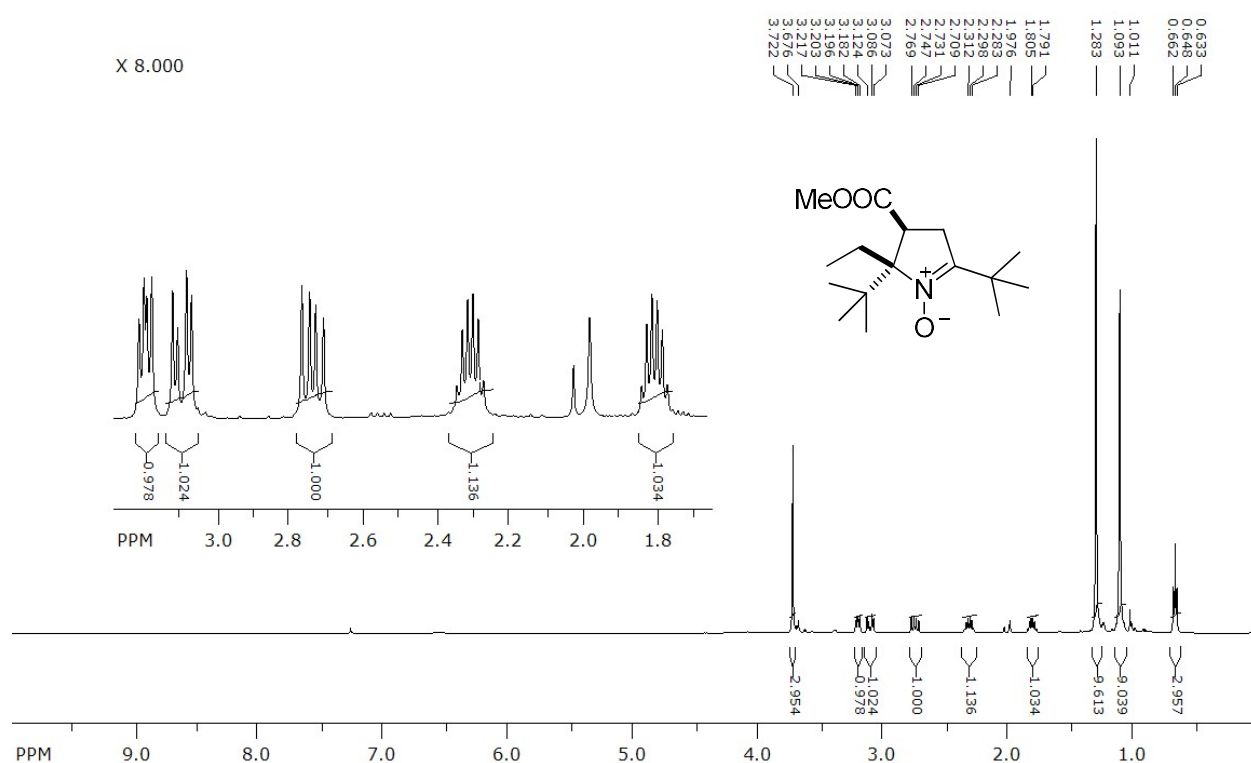

**Figure S26.**  $^{13}\text{C}$  NMR (125 MHz;  $\text{CDCl}_3$ ) of (2S(R),3S(R))-2,5-di-*tert*-butyl-2-ethyl-3-(methoxycarbonyl)-3,4-dihydro-2H-pyrrole 1-oxide (**18**)

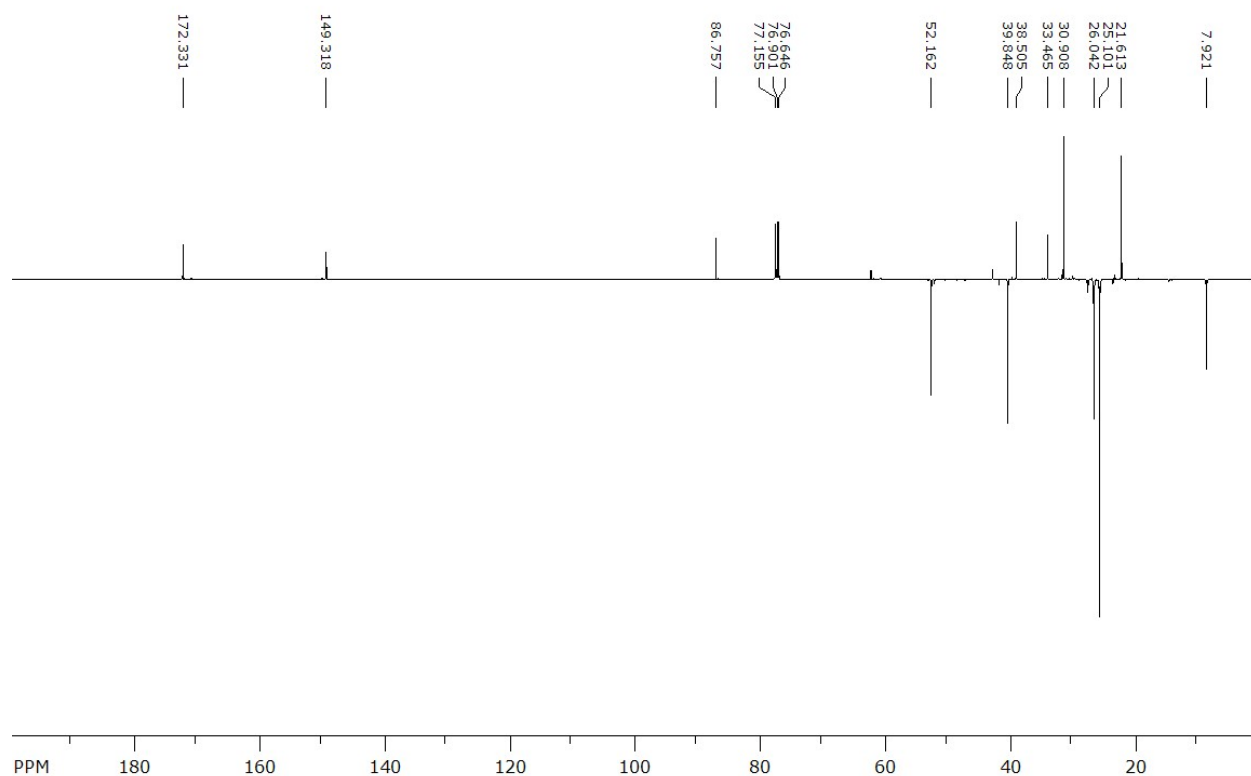

**Figure S27.**  $^1\text{H}$  NMR (600 MHz;  $\text{CDCl}_3$ ) of (2S(R),3R(S))-2,5-di-*tert*-butyl-2-ethyl-3-(hydroxymethyl)-3,4-dihydro-2H-pyrrole 1-oxide (**20**)

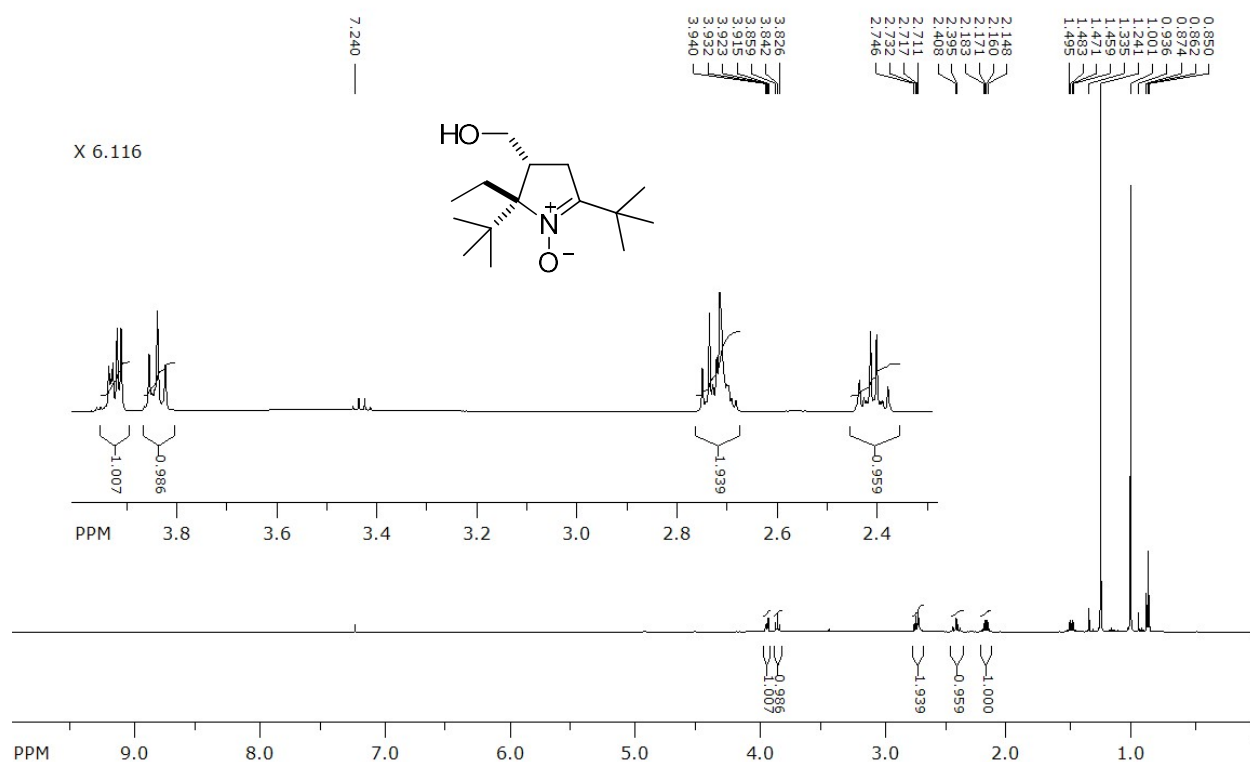

**Figure S28.**  $^{13}\text{C}$  NMR (150 MHz;  $\text{CDCl}_3$ ) of (2S(R),3R(S))-2,5-di-*tert*-butyl-2-ethyl-3-(hydroxymethyl)-3,4-dihydro-2H-pyrrole 1-oxide (**20**)

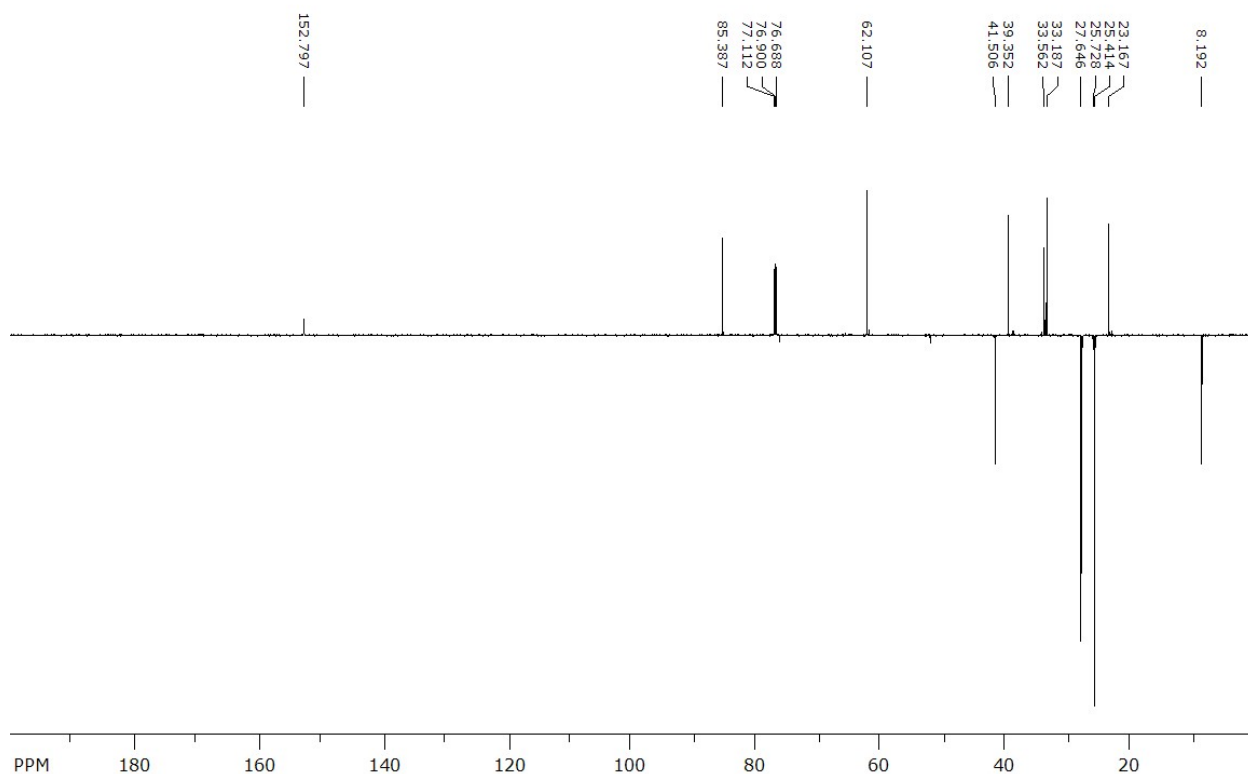

**Figure S29.**  $^1\text{H}$  NMR (400 MHz;  $\text{CDCl}_3$ ) of (2S(R),3S(R))-2,5-di-*tert*-butyl-2-ethyl-3-(hydroxymethyl)-3,4-dihydro-2H-pyrrole 1-oxide (**21**)

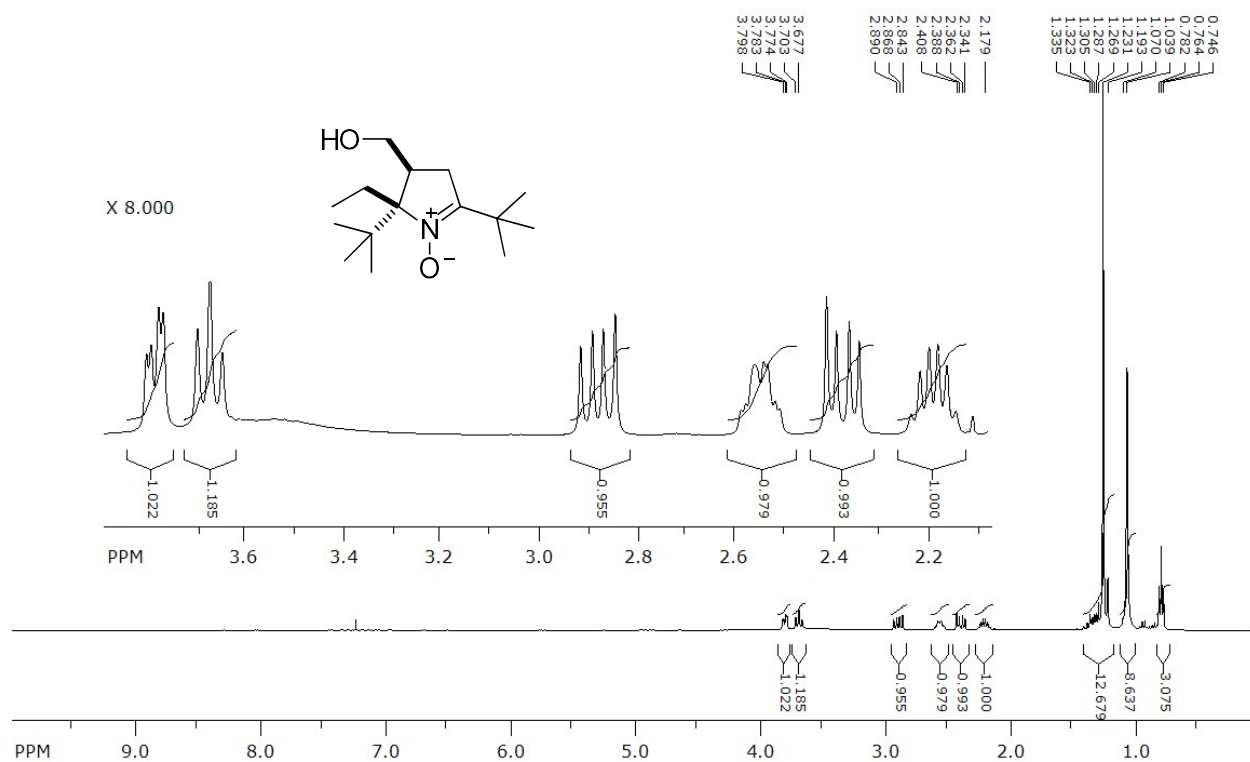

**Figure S30.**  $^{13}\text{C}$  NMR (125 MHz;  $\text{CDCl}_3$ ) of (2S(R),3S(R))-2,5-di-*tert*-butyl-2-ethyl-3-(hydroxymethyl)-3,4-dihydro-2H-pyrrole 1-oxide (**21**)

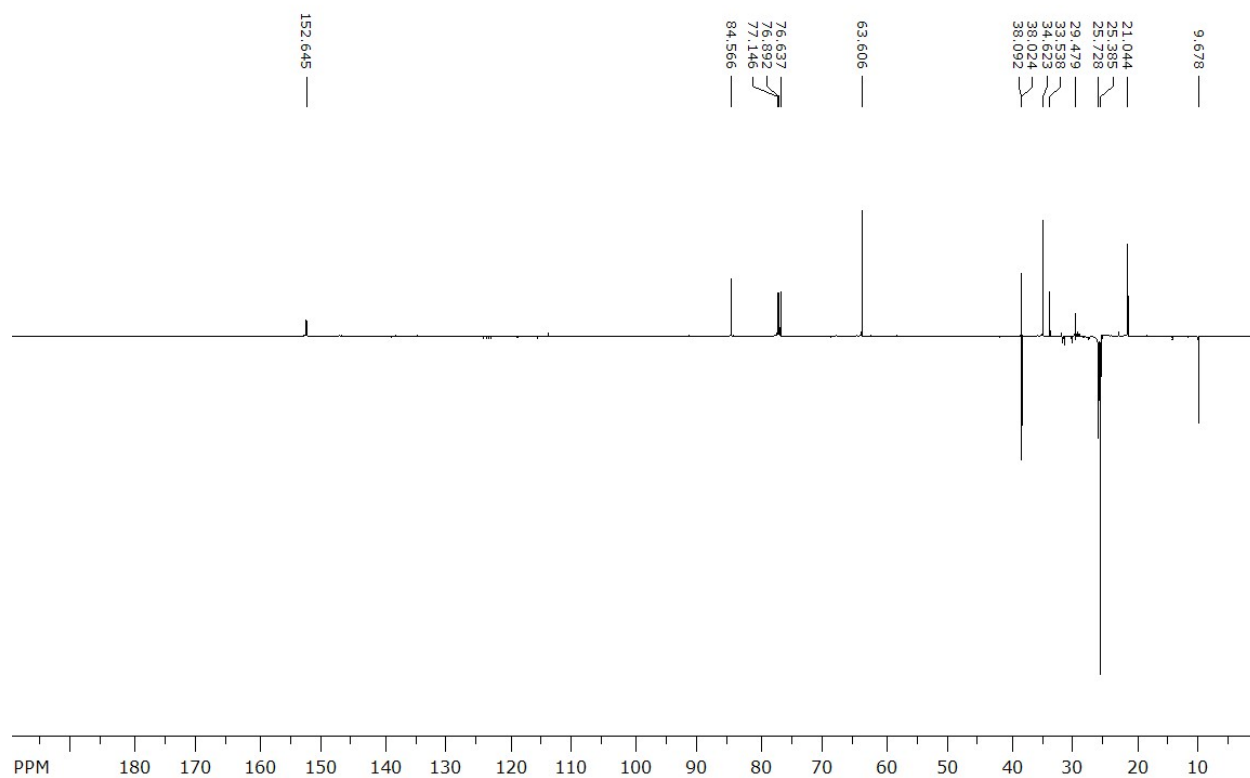

**Figure S31.**  $^1\text{H}$  NMR (400 MHz;  $\text{CD}_3\text{OD}$ ,  $\text{Zn}/\text{CF}_3\text{COOH}$  system) of (2*S*(*R*),3*R*(*S*))-2,5-di-tert-butyl-2,5-diethyl-3-(hydroxymethyl)pyrrolidin-1-oxyl (**23**)

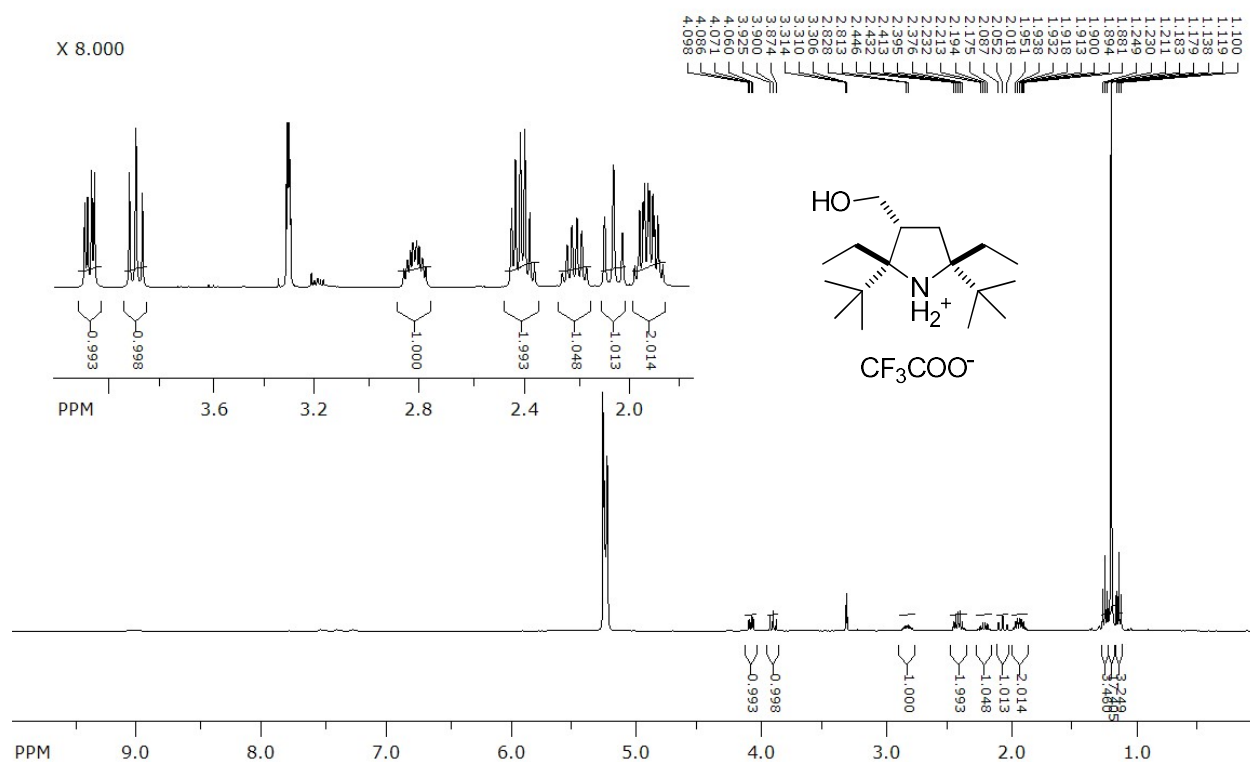

**Figure S32.**  $^{13}\text{C}$  NMR (75 MHz;  $\text{CD}_3\text{OD}$ ,  $\text{Zn}/\text{CF}_3\text{COOH}$  system) of (2*S*(*R*),3*R*(*S*))-2,5-di-tert-butyl-2,5-diethyl-3-(hydroxymethyl)pyrrolidin-1-oxyl (**23**)

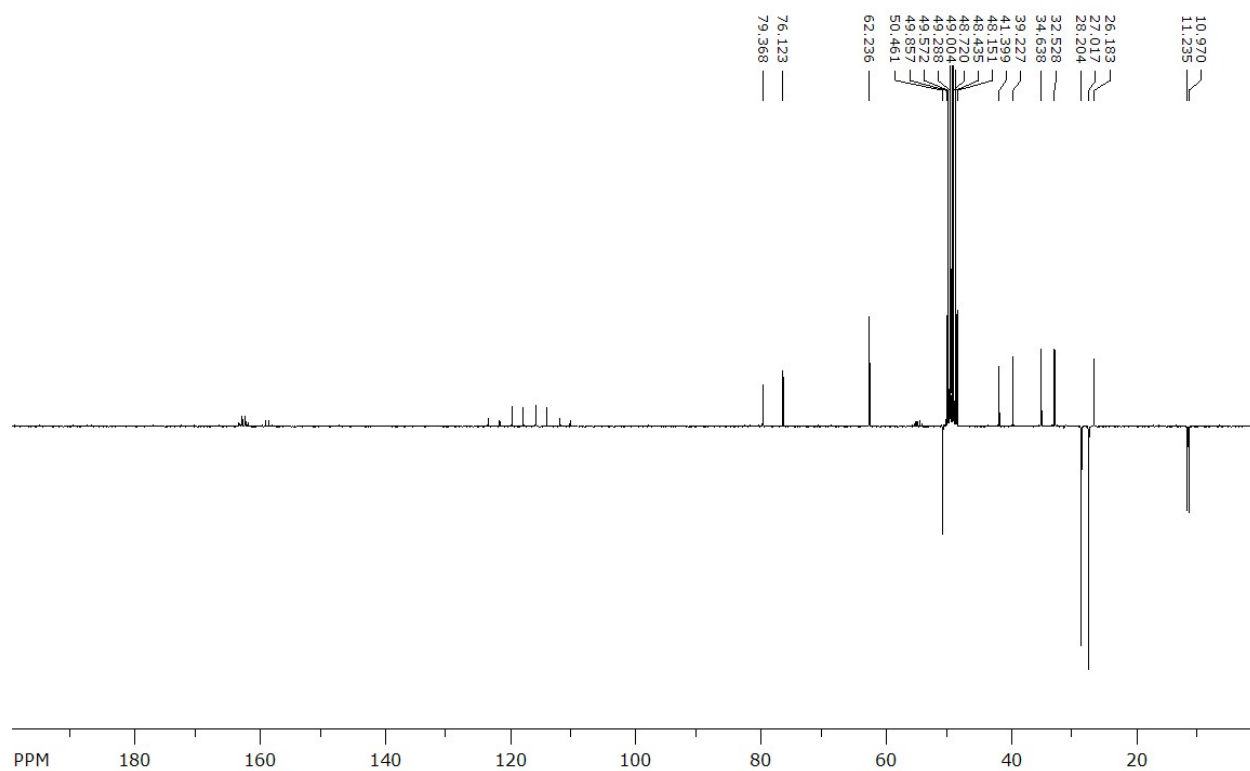

**Figure S33.**  $^1\text{H}$  NMR (400 MHz;  $\text{CD}_3\text{OD}$ ,  $\text{Zn}/\text{CF}_3\text{COOH}$  system) of ((2S(R),3R(S),5S(R))-2,5-di-*tert*-butyl-2,5-diethyl-3-(((3-(trimethylammonio)propyl)carbamoyl)oxy)methyl)pyrrolidin-1-oxyl) monoiodide (**26**)

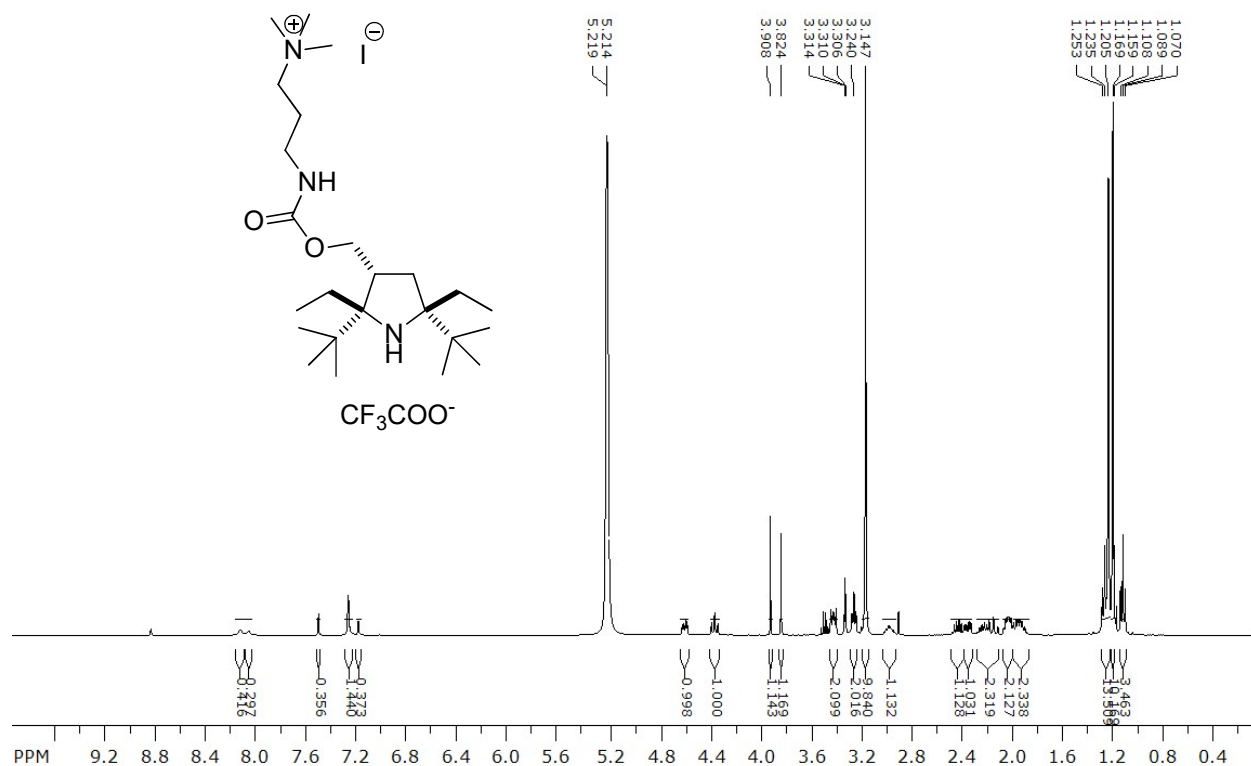

**Figure S34.**  $^{13}\text{C}$  NMR (100 MHz;  $\text{CD}_3\text{OD}$ ,  $\text{Zn}/\text{CF}_3\text{COOH}$  system) of ((2S(R),3R(S),5S(R))-2,5-di-*tert*-butyl-2,5-diethyl-3-(((3-(trimethylammonio)propyl)carbamoyl)oxy)methyl)pyrrolidin-1-oxyl) monoiodide (**26**)

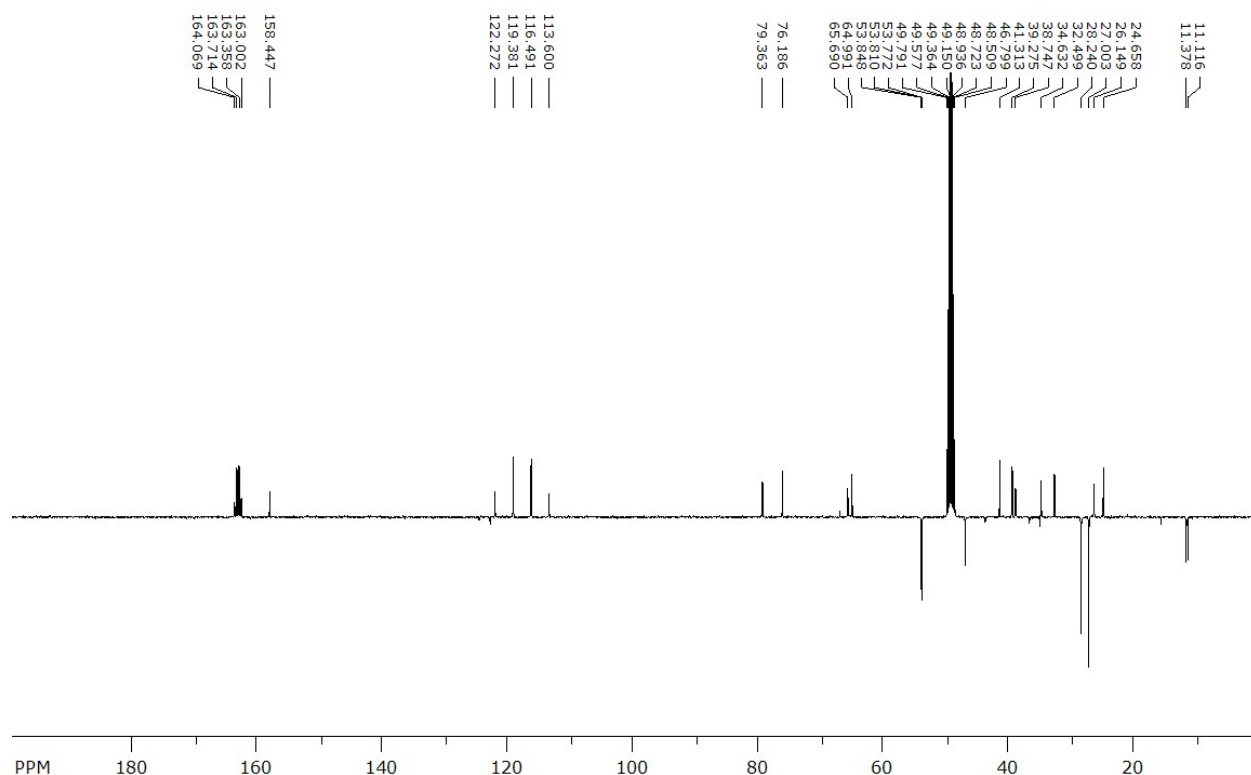

## 2D NMR Spectra

**Figure S35.** HMBC (400 MHz;  $(\text{CD}_3)_2\text{CO}$ ;  $\text{CF}_3\text{COOH}$ ) of (2R(S),3R(S),4R(S),5S(R))-2,5-di-*tert*-butyl-3,4-bis(methoxycarbonyl)-2-ethylpyrrolidine (**8**)

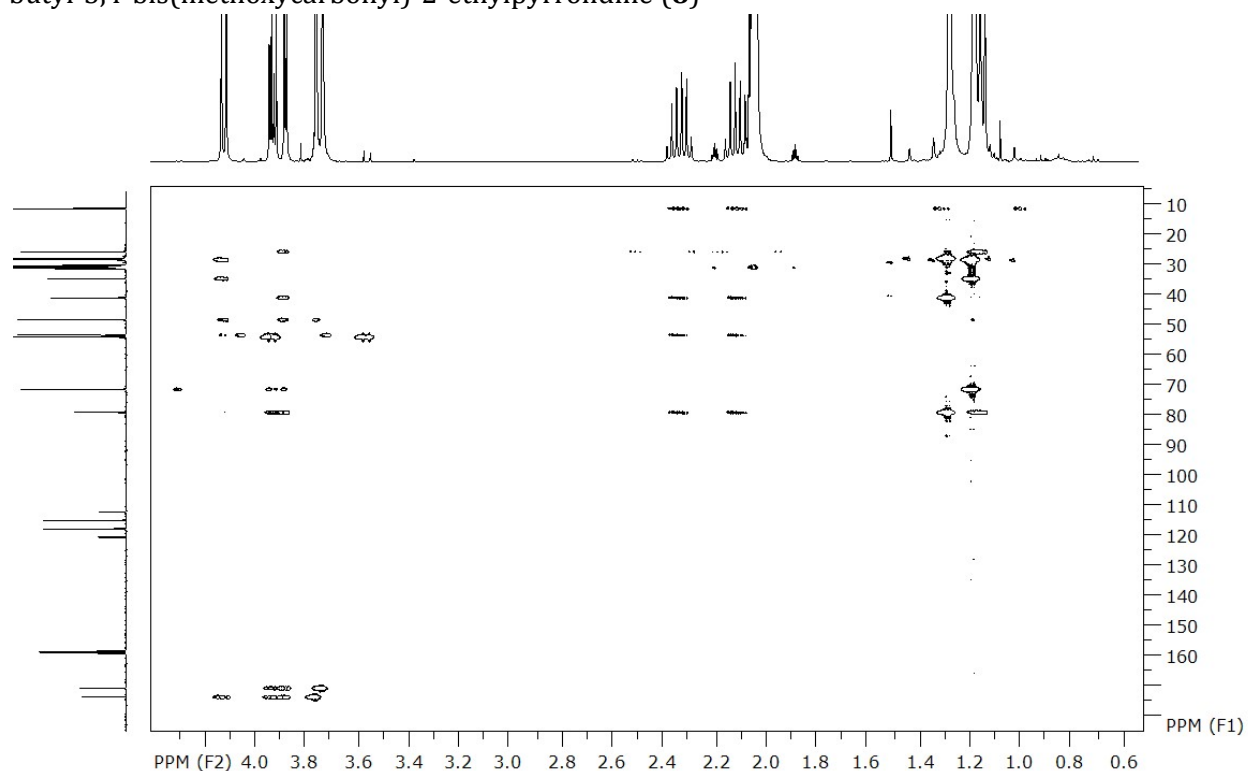

**Figure S36.** NOESY (400 MHz;  $(\text{CD}_3)_2\text{CO}$ ;  $\text{CF}_3\text{COOH}$ ) of (2R(S),3R(S),4R(S),5S(R))-2,5-di-*tert*-butyl-3,4-bis(methoxycarbonyl)-2-ethylpyrrolidine (**8**)

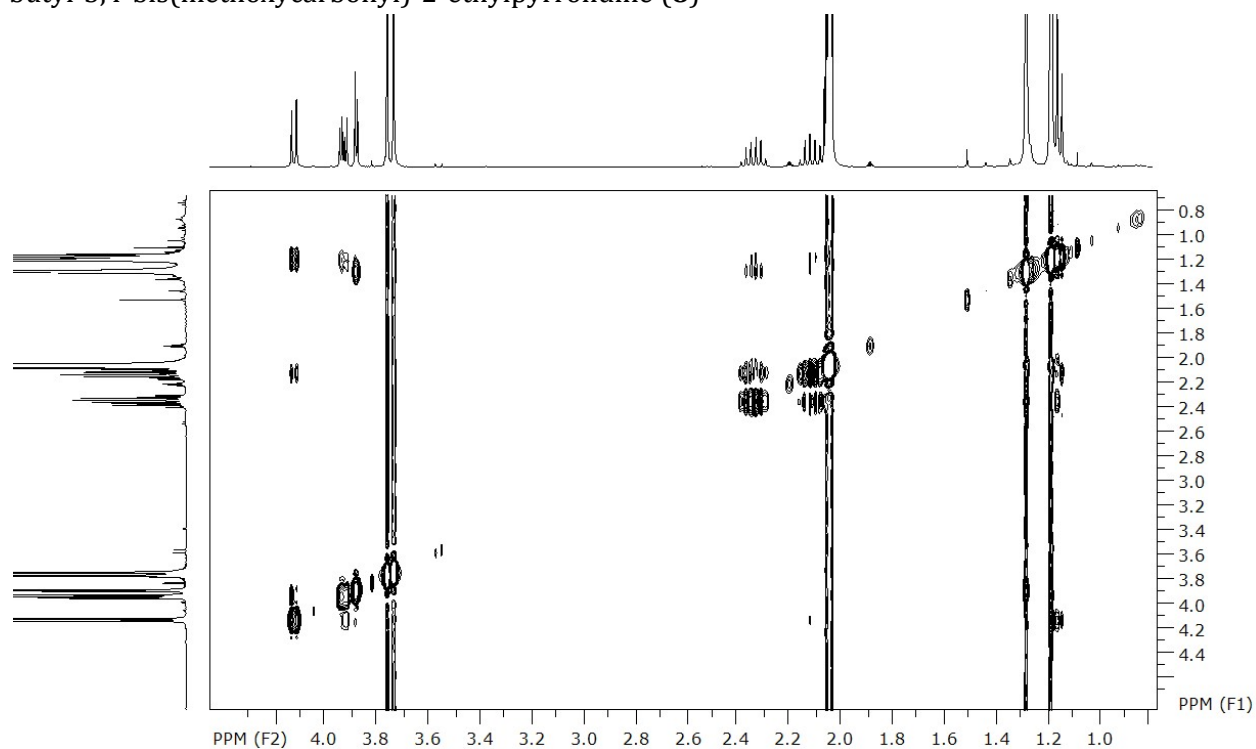

**Figure S37.** NOESY (600 MHz; CDCl<sub>3</sub>) of (2*S*(*R*),3*R*(*S*),4*R*(*S*),5*R*(*S*))-2,5-di-*tert*-butyl-3,4-bis(methoxycarbonyl)-2-ethylpyrrolidine (**9**)

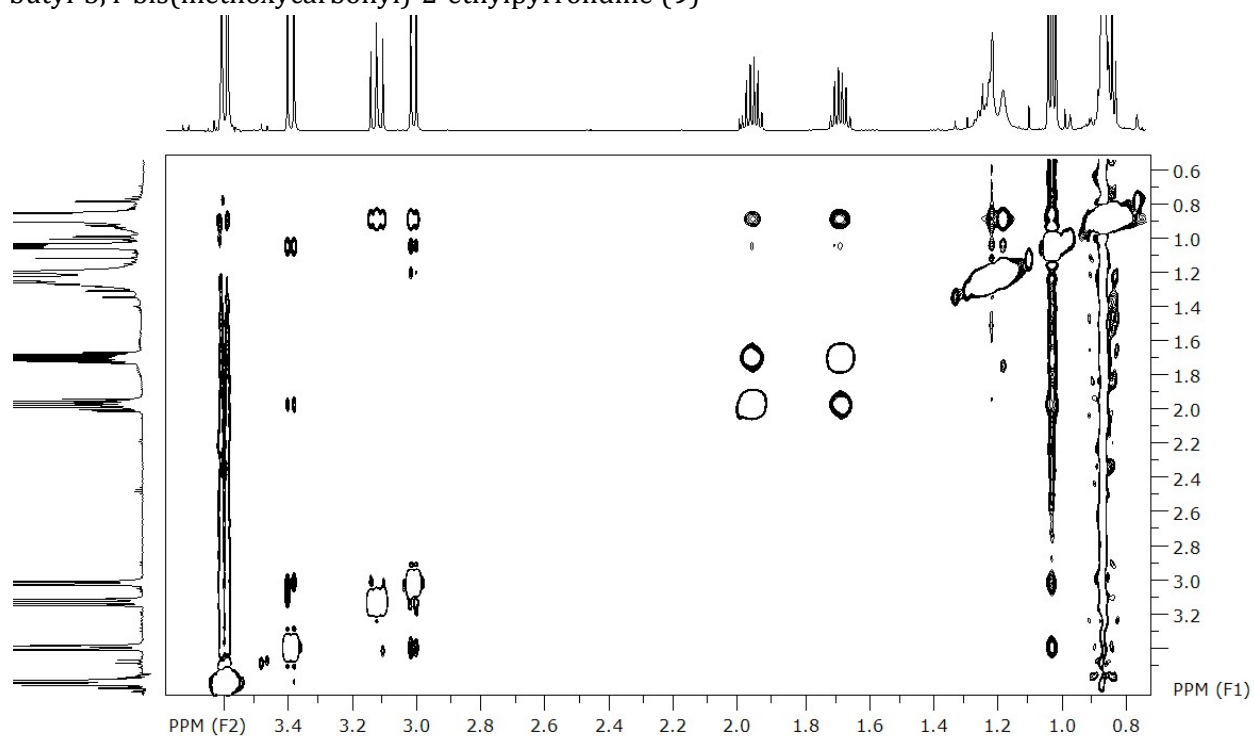

**Figure S38.** HMBC (400 MHz; CDCl<sub>3</sub>) of (2*R*(*S*),3*R*(*S*),4*R*(*S*))-2,5-di-*tert*-butyl-2-ethyl-3,4-bis(hydroxymethyl)-3,4-dihydro-2*H*-pyrrole 1-oxide (**12**)

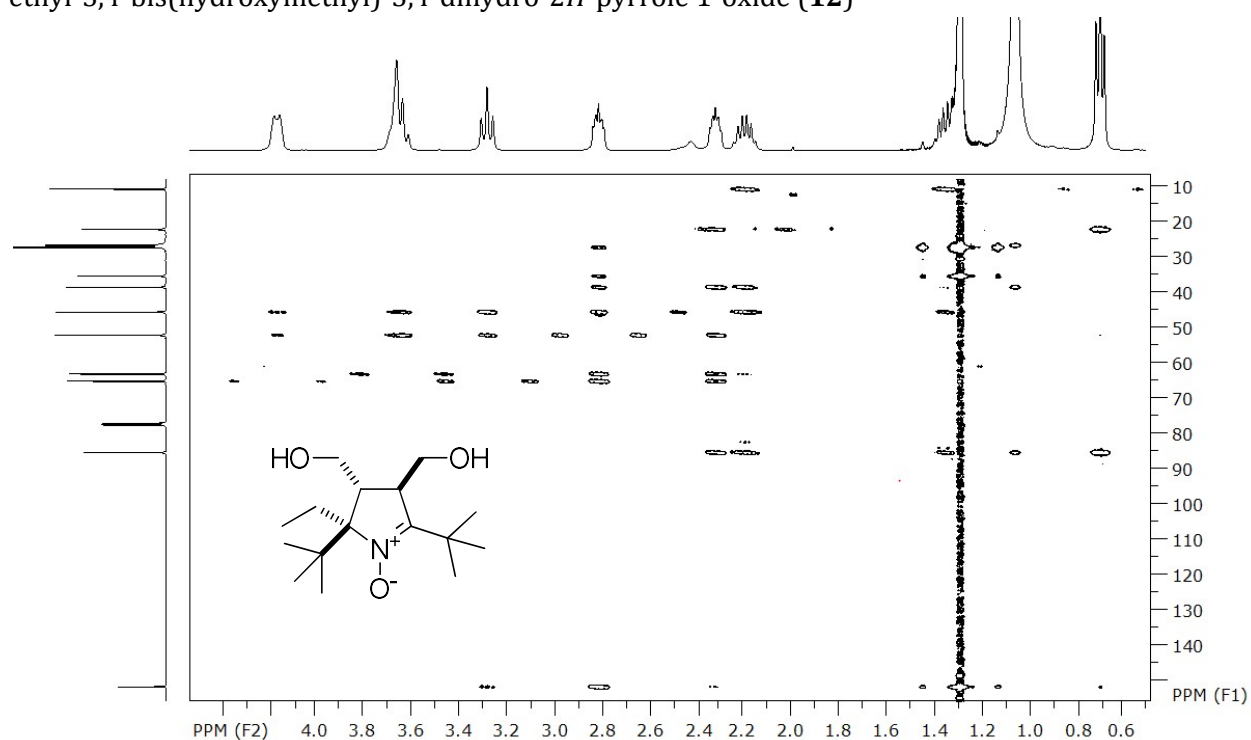

**Figure S39.** NOESY (400 MHz; CDCl<sub>3</sub>) of (2R(S),3R(S),4R(S))-2,5-di-*tert*-butyl-ethyl-3,4-bis(hydroxymethyl)-3,4-dihydro-2*H*-pyrrole 1-oxide (**12**)

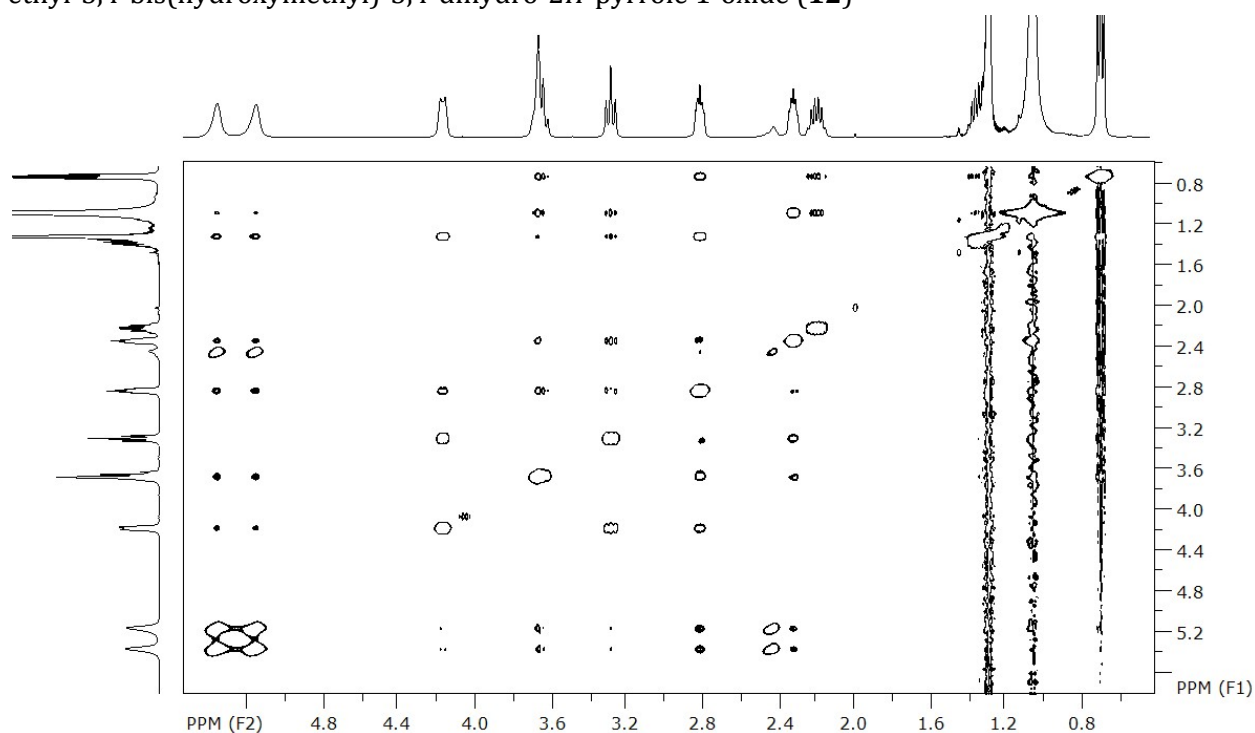

**Figure S40.** COSY (400 MHz, CDCl<sub>3</sub>) of (1S(R),4R(S),5R(S))-2,4-di-*tert*-butyl-4-ethyl-1-propyl-3-azabicyclo[3.1.0]hex-2-ene (**15**)

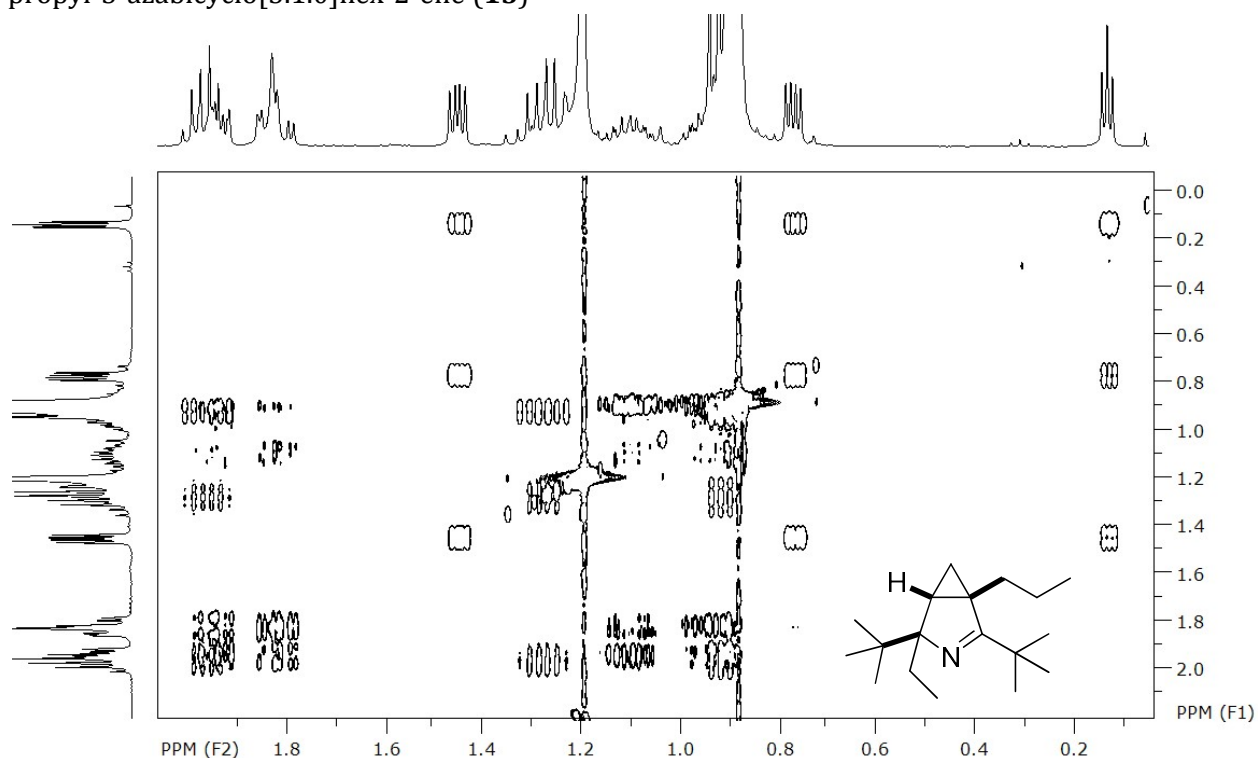



**Figure S41.** HSQC (400 MHz, CDCl<sub>3</sub>) of (1*S*(R),4*R*(S),5*R*(S))-2,4-di-*tert*-butyl-4-ethyl-1-propyl-3-azabicyclo[3.1.0]hex-2-ene (**15**)

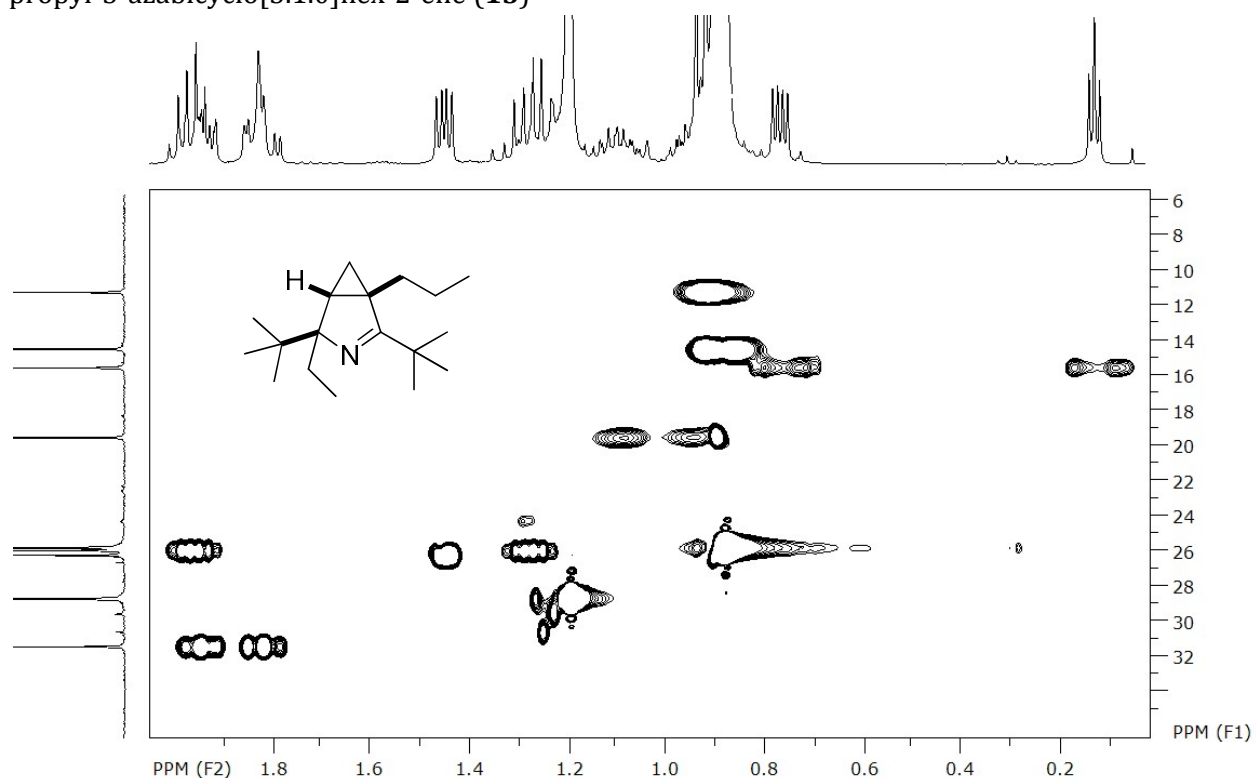

**Figure S42.** HMBC (400 MHz, CDCl<sub>3</sub>) of (1*S*(R),4*R*(S),5*R*(S))-2,4-di-*tert*-butyl-4-ethyl-1-propyl-3-azabicyclo[3.1.0]hex-2-ene (**15**)

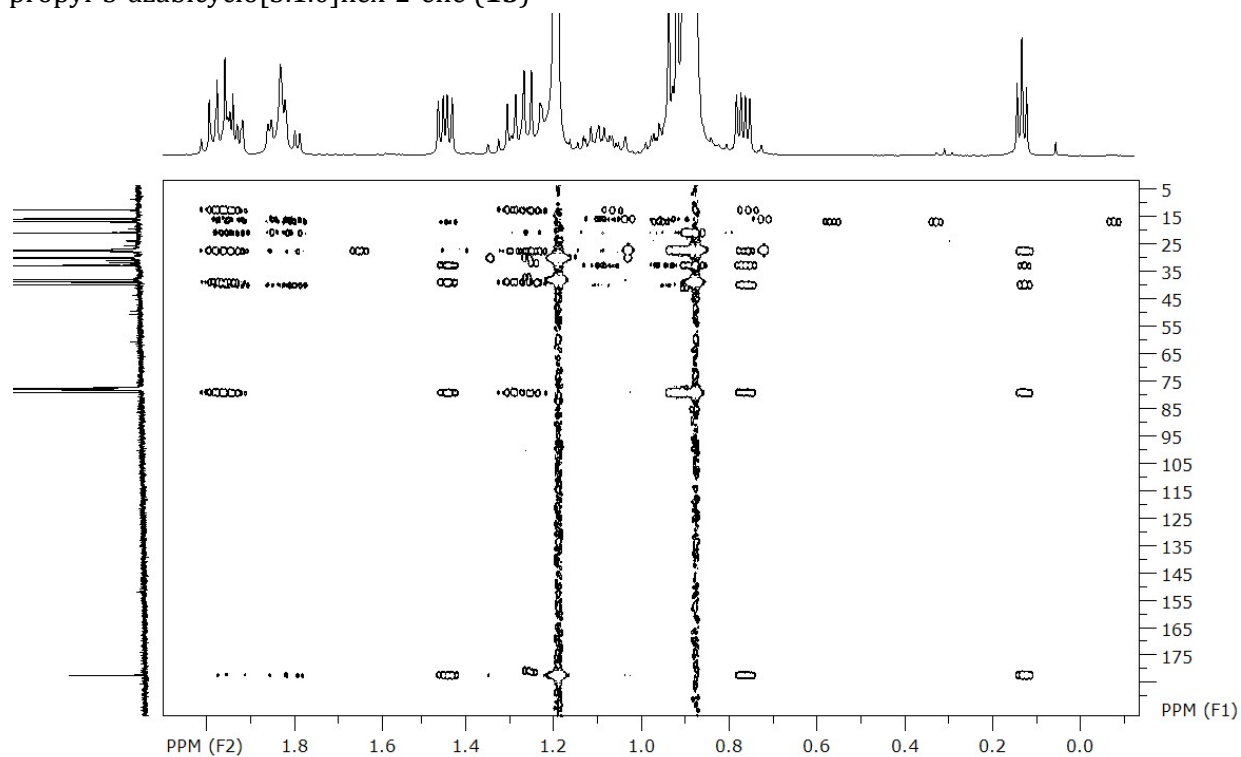

**Figure S43.** NOESY (400 MHz, CDCl<sub>3</sub>) of (1*S*(R),4*R*(S),5*R*(S))-2,4-di-*tert*-butyl-4-ethyl-1-propyl-3-azabicyclo[3.1.0]hex-2-ene (**15**)

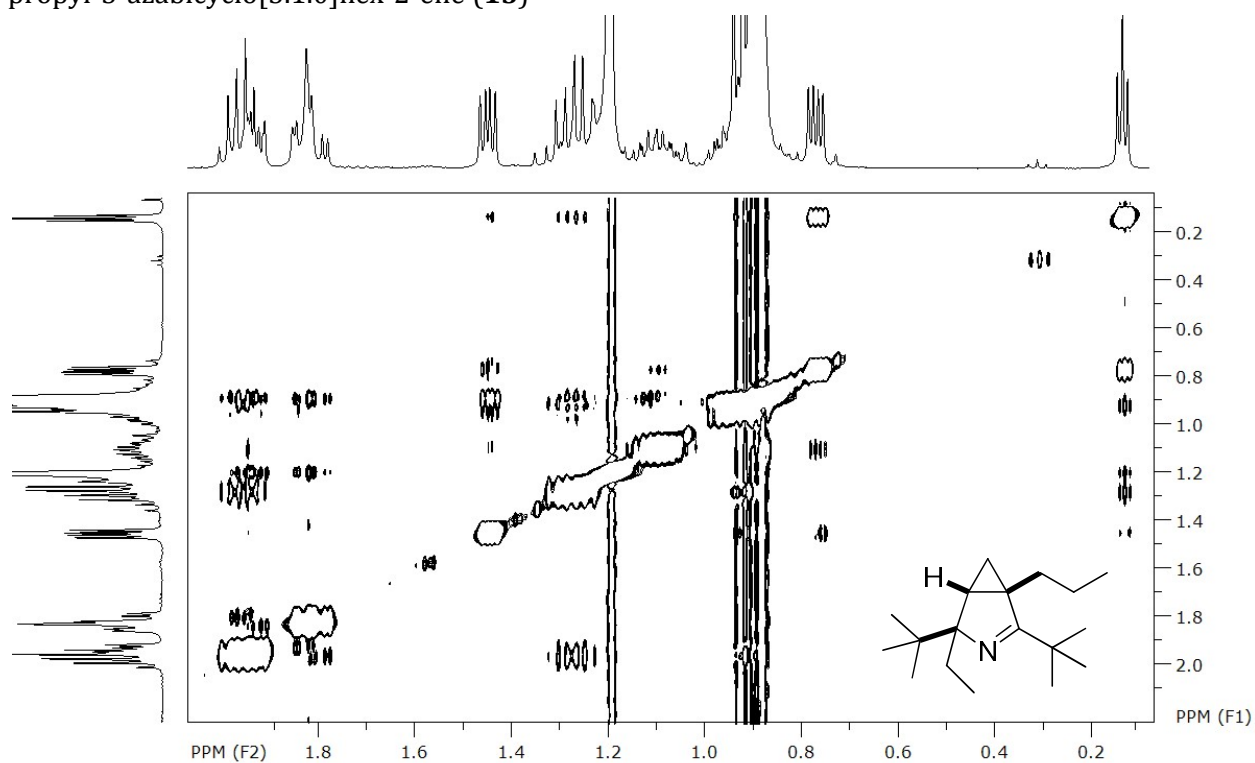

**Figure S44.** COSY (400 MHz; CD<sub>3</sub>OD, Zn/CF<sub>3</sub>COOH system) of ((2*S*(R),3*R*(S),5*S*(R))-2,5-di-*tert*-butyl-2,5-diethyl-3-(((3-(trimethylammonio)propyl)carbamoyl)oxy)methyl)pyrrolidin-1-oxyl) monoiodide (**26**)

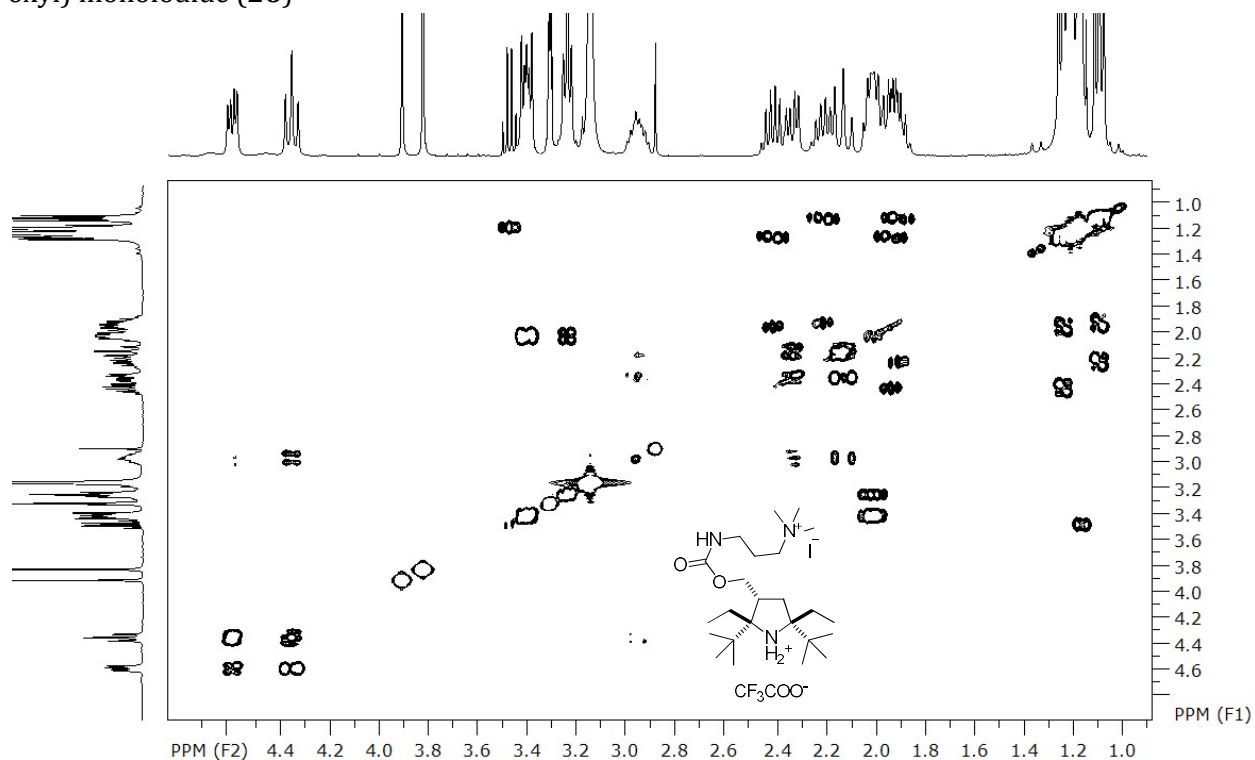

**Figure S45.** HSQC (400 MHz; CD<sub>3</sub>OD, Zn/CF<sub>3</sub>COOH system) of ((2*S*(R),3*R*(S),5*S*(R))-2,5-di-*tert*-butyl-2,5-diethyl-3-((((3-(trimethylammonio)propyl)carbamoyl)oxy)methyl)pyrrolidin-1-oxyl) monoiodide (**26**)

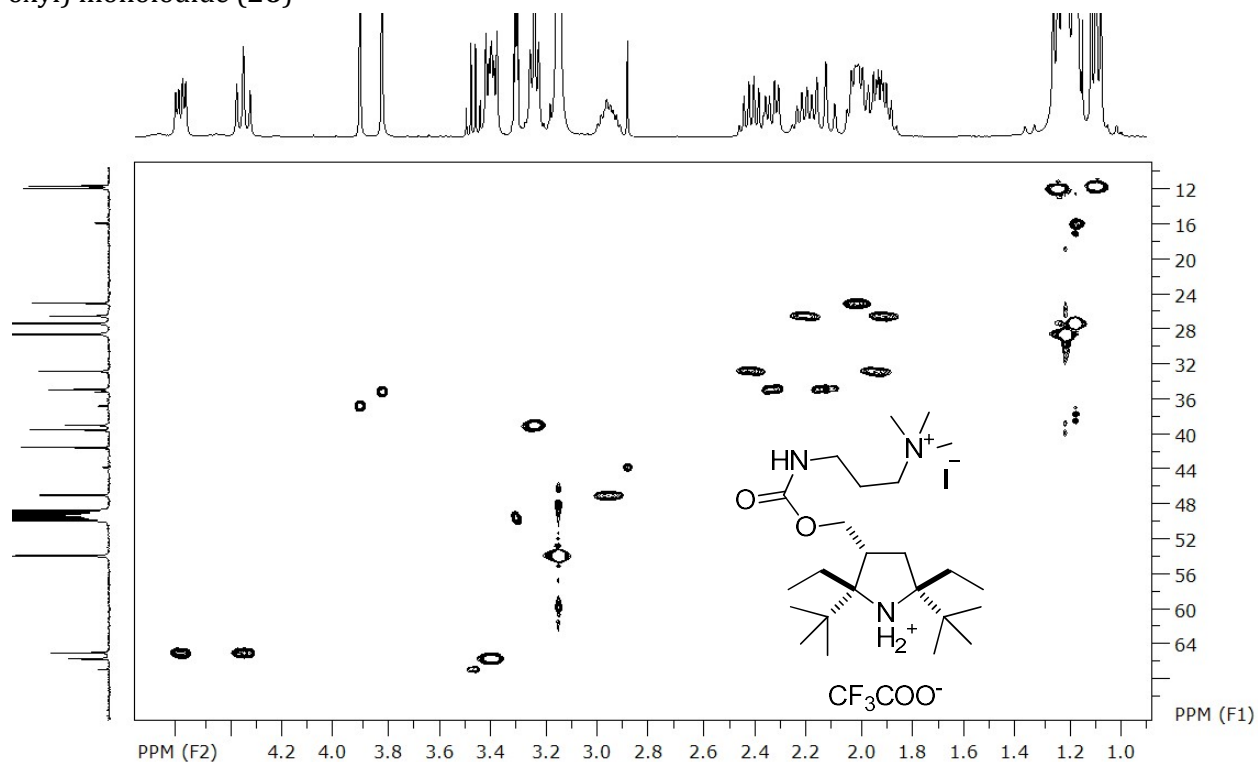

**Figure S46.** HMBC (400 MHz; CD<sub>3</sub>OD, Zn/CF<sub>3</sub>COOH system) of ((2*S*(R),3*R*(S),5*S*(R))-2,5-di-*tert*-butyl-2,5-diethyl-3-((((3-(trimethylammonio)propyl)carbamoyl)oxy)methyl)pyrrolidin-1-oxyl) monoiodide (**26**)

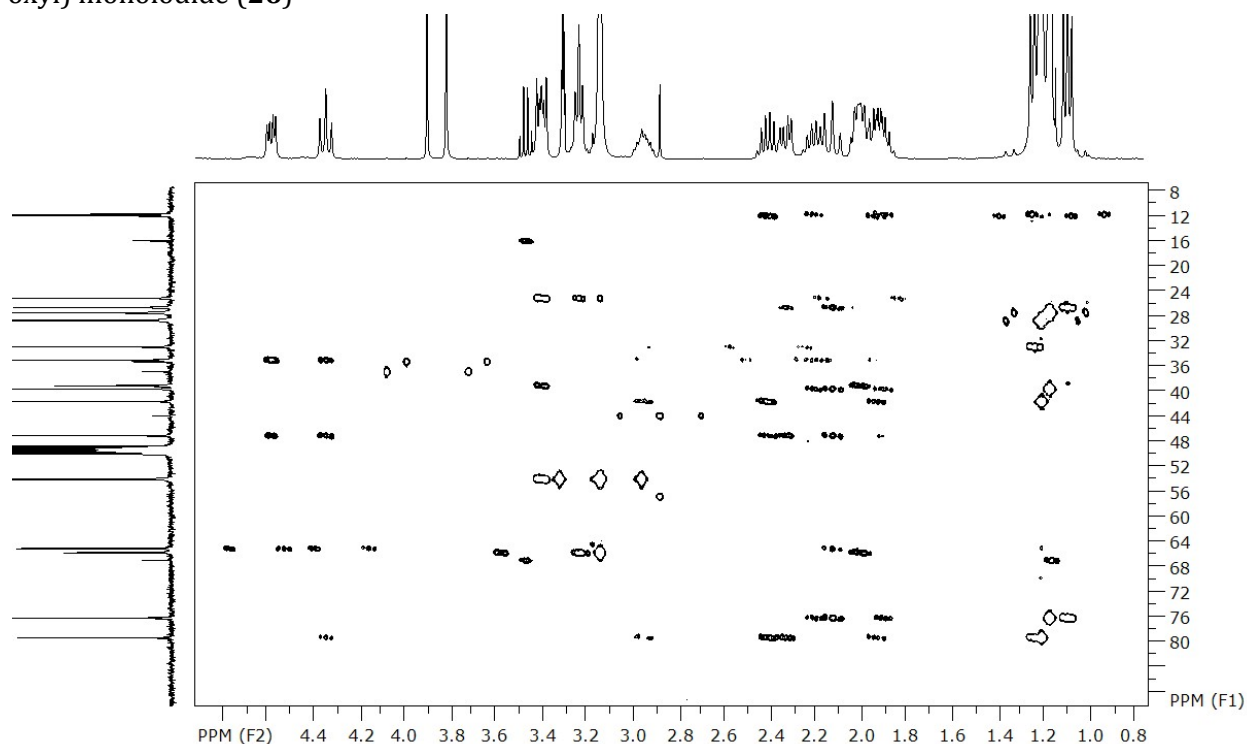

**Figure S47.** NOESY (400 MHz; CD<sub>3</sub>OD, Zn/CF<sub>3</sub>COOH system) of ((2S(R),3R(S),5S(R))-2,5-di-*tert*-butyl-2,5-diethyl-3-((((3-(trimethylammonio)propyl)carbamoyl)oxy)methyl)pyrrolidin-1-oxyl) monoiodide (**26**)

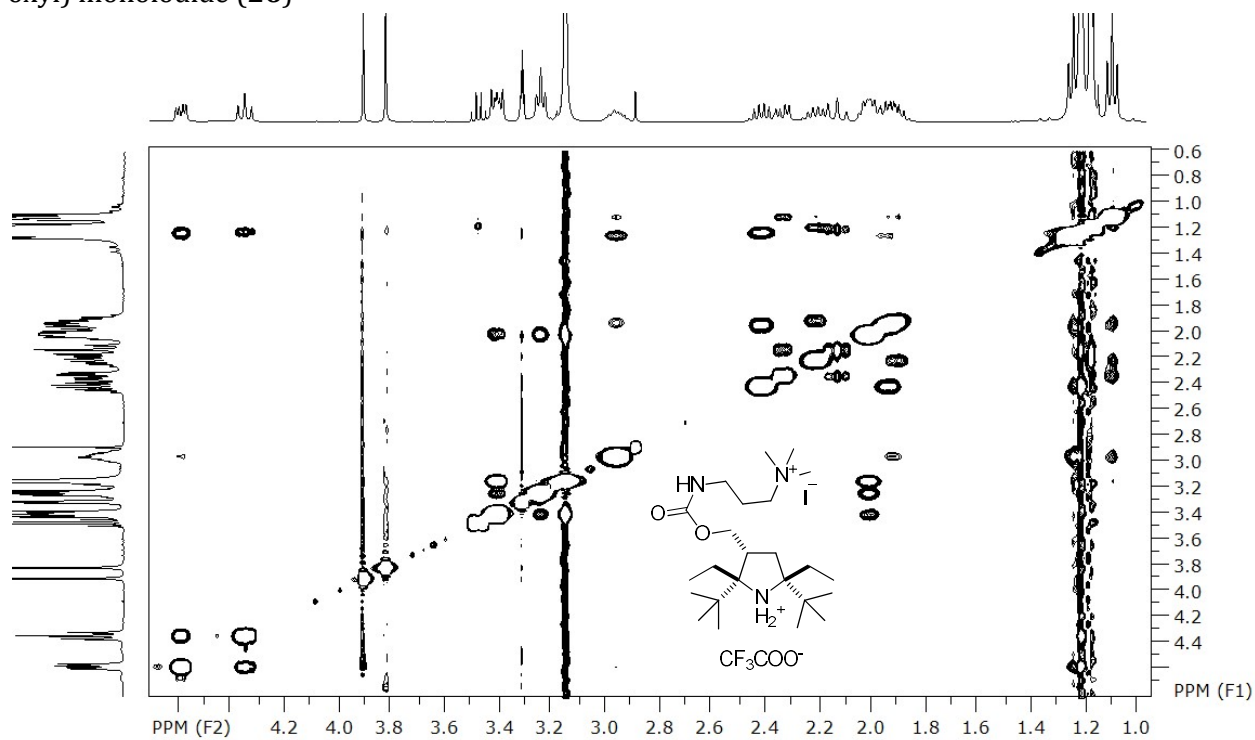

## Line shape analysis

The analysis was performed using the gNMR 5.0 software [Budzelaar, P. H. M. "gNMR, version 5.0. 6.0." *Ivorysoft, Nijmegen, Netherlands* (2006).].

**Figure S48.** Simulated spectrum for (1S(R),4R(S),5R(S))-2,4-di-tert-butyl-4-ethyl-1-propyl-3-azabicyclo[3.1.0]hex-2-ene (**15**)

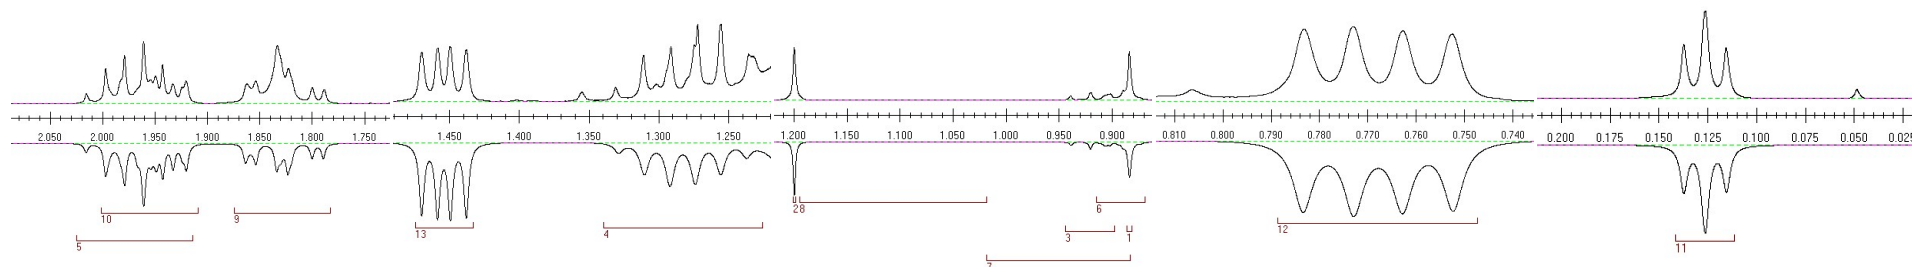

**Table S1.** Parameters of spins system (1S(R),4R(S),5R(S))-2,4-di-tert-butyl-4-ethyl-1-propyl-3-azabicyclo[3.1.0]hex-2-ene (**15**)

| #  | n | Shift  | Width | J[1] | J[2] | J[3] | J[4]   | J[5] | J[6] | J[7]   | J[8]  | J[9]   | J[10] | J[11] | J[12] |
|----|---|--------|-------|------|------|------|--------|------|------|--------|-------|--------|-------|-------|-------|
| 1  | 9 | 0.884  | 1.53  |      |      |      |        |      |      |        |       |        |       |       |       |
| 2  | 9 | 1.200  | 1.41  | -    |      |      |        |      |      |        |       |        |       |       |       |
| 3  | 3 | 0.921  | 1.24  | -    | -    |      |        |      |      |        |       |        |       |       |       |
| 4  | 1 | 1.283  | 2.94  | -    | -    | 7.85 |        |      |      |        |       |        |       |       |       |
| 5  | 1 | 1.969  | 1.72  | -    | -    | 7.21 | -14.54 |      |      |        |       |        |       |       |       |
| 6  | 3 | 0.892  | 1.25  | -    | -    | -    | -      | -    | 7.4* |        |       |        |       |       |       |
| 7  | 1 | 0.951* | -     | -    | -    | -    | -      | -    | 7.4* | -14.4* |       |        |       |       |       |
| 8  | 1 | 1.106* | -     | -    | -    | -    | -      | -    | -    | 4.31   | 12.31 |        |       |       |       |
| 9  | 1 | 1.829  | 1.77  | -    | -    | -    | -      | -    | -    | 5.18   | 11.42 | -13.57 |       |       |       |
| 10 | 1 | 1.955  | 1.82  | -    | -    | -    | -      | -    | -    | -      | -     | -      | -     |       |       |
| 11 | 1 | 0.126  | 1.78  | -    | -    | -    | -      | -    | -    | -      | -     | -      | -     |       |       |
| 12 | 1 | 0.768  | 1.97  | -    | -    | -    | -      | -    | -    | -      | -     | -      | -     | -4.20 |       |
| 13 | 1 | 1.454  | 1.70  | -    | -    | -    | -      | -    | -    | -      | -     | -      | -     | 4.56  | 8.24  |

\*the data is not reliably determined

**Figure S49.** Simulated spectrum for mono((2*S*(R),3*R*(S),5*S*(R))-2,5-di-*tert*-butyl-2,5-diethyl-3-(((3-(trimethylammonio)propyl)carbamoyl)oxy)methyl)pyrrolidin-1-oxyl) monoiodide (**26**)

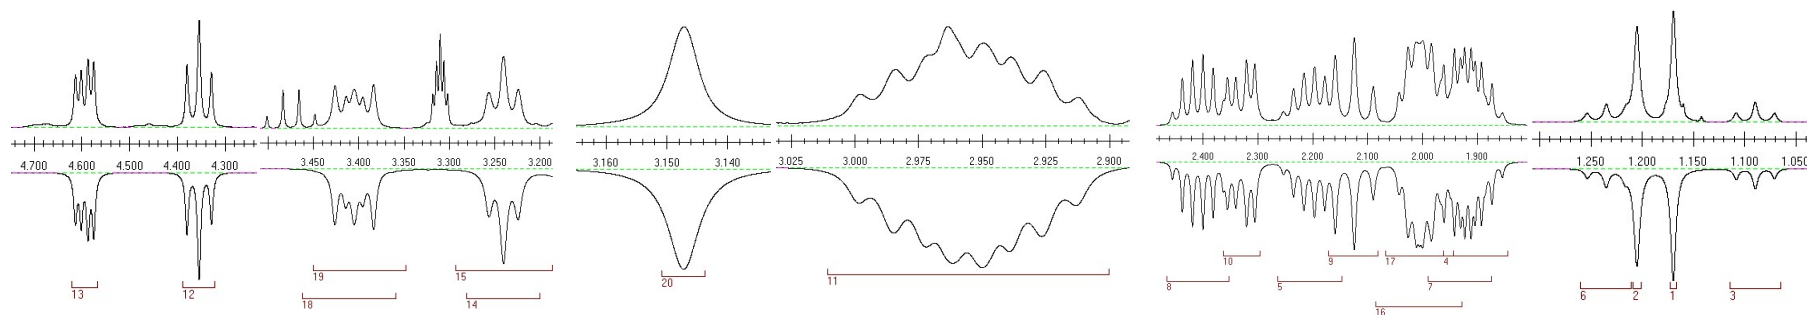

**Table S2.** Parameters of spins system for mono((2*S*(R),3*R*(S),5*S*(R))-2,5-di-*tert*-butyl-2,5-diethyl-3-(((3-(trimethylammonio)propyl)carbamoyl)oxy)methyl)pyrrolidin-1-oxyl) monoiodide (**26**)

| #  | n | Shift | Width | J[1] | J[2] | J[3] | J[4]   | J[5] | J[6] | J[7]   | J[8] | J[9]   | J[10] | J[11] | J[12]  | J[13] | J[14]   | J[15] | J[16]   | J[17] | J[18]   | J[19] |
|----|---|-------|-------|------|------|------|--------|------|------|--------|------|--------|-------|-------|--------|-------|---------|-------|---------|-------|---------|-------|
| 1  | 9 | 1.169 | 2.45  |      |      |      |        |      |      |        |      |        |       |       |        |       |         |       |         |       |         |       |
| 2  | 9 | 1.205 | 2.84  | -    |      |      |        |      |      |        |      |        |       |       |        |       |         |       |         |       |         |       |
| 3  | 3 | 1.090 | 2.25  | -    | -    |      |        |      |      |        |      |        |       |       |        |       |         |       |         |       |         |       |
| 4  | 1 | 1.903 | 2.89  | -    | -    | 7.59 |        |      |      |        |      |        |       |       |        |       |         |       |         |       |         |       |
| 5  | 1 | 2.205 | 3.33  | -    | -    | 7.37 | -15.41 |      |      |        |      |        |       |       |        |       |         |       |         |       |         |       |
| 6  | 3 | 1.235 | 2.59  | -    | -    | -    | -      | -    |      |        |      |        |       |       |        |       |         |       |         |       |         |       |
| 7  | 1 | 1.933 | 2.75  | -    | -    | -    | -      | -    | 7.43 |        |      |        |       |       |        |       |         |       |         |       |         |       |
| 8  | 1 | 2.409 | 2.44  | -    | -    | -    | -      | -    | 7.25 | -15.23 |      |        |       |       |        |       |         |       |         |       |         |       |
| 9  | 1 | 2.126 | 3.73  | -    | -    | -    | -      | -    | -    | -      | -    |        |       |       |        |       |         |       |         |       |         |       |
| 10 | 1 | 2.329 | 3.35  | -    | -    | -    | -      | -    | -    | -      | -    | -13.94 |       |       |        |       |         |       |         |       |         |       |
| 11 | 1 | 2.955 | 3.92  | -    | -    | -    | -      | -    | -    | -      | -    | 13.72  | 5.99  |       |        |       |         |       |         |       |         |       |
| 12 | 1 | 4.355 | 3.10  | -    | -    | -    | -      | -    | -    | -      | -    | -      | -     | 9.98  |        |       |         |       |         |       |         |       |
| 13 | 1 | 4.594 | 3.19  | -    | -    | -    | -      | -    | -    | -      | -    | -      | -     | 4.85  | -10.59 |       |         |       |         |       |         |       |
| 14 | 1 | 3.241 | 4.20  | -    | -    | -    | -      | -    | -    | -      | -    | -      | -     | -     | -      | -     |         |       |         |       |         |       |
| 15 | 1 | 3.240 | 2.88  | -    | -    | -    | -      | -    | -    | -      | -    | -      | -     | -     | -      | -     | -16.26* |       |         |       |         |       |
| 16 | 1 | 2.006 | 2.63  | -    | -    | -    | -      | -    | -    | -      | -    | -      | -     | -     | -      | -     | 4.75    | 9.92  |         |       |         |       |
| 17 | 1 | 2.005 | 3.40  | -    | -    | -    | -      | -    | -    | -      | -    | -      | -     | -     | -      | -     | 2.98    | 8.09  | -16.53* |       |         |       |
| 18 | 1 | 3.410 | 2.85  | -    | -    | -    | -      | -    | -    | -      | -    | -      | -     | -     | -      | -     | -       | -     | 6.83    | 10.43 |         |       |
| 19 | 1 | 3.399 | 2.62  | -    | -    | -    | -      | -    | -    | -      | -    | -      | -     | -     | -      | -     | -       | -     | 14.69   | 2.46  | -15.78* |       |
| 20 | 9 | 3.147 | 2.47  | -    | -    | -    | -      | -    | -    | -      | -    | -      | -     | -     | -      | -     | -       | -     | -       | -     | -       | -     |

\*the data is not reliably determined

## IR Spectra

**Figure S50.** IR (neat) of (2R(S),3R(S),4R(S),5S(R))-2,5-di-*tert*-butyl-3,4-bis(methoxycarbonyl)-2-ethylpyrrolidine (**8**)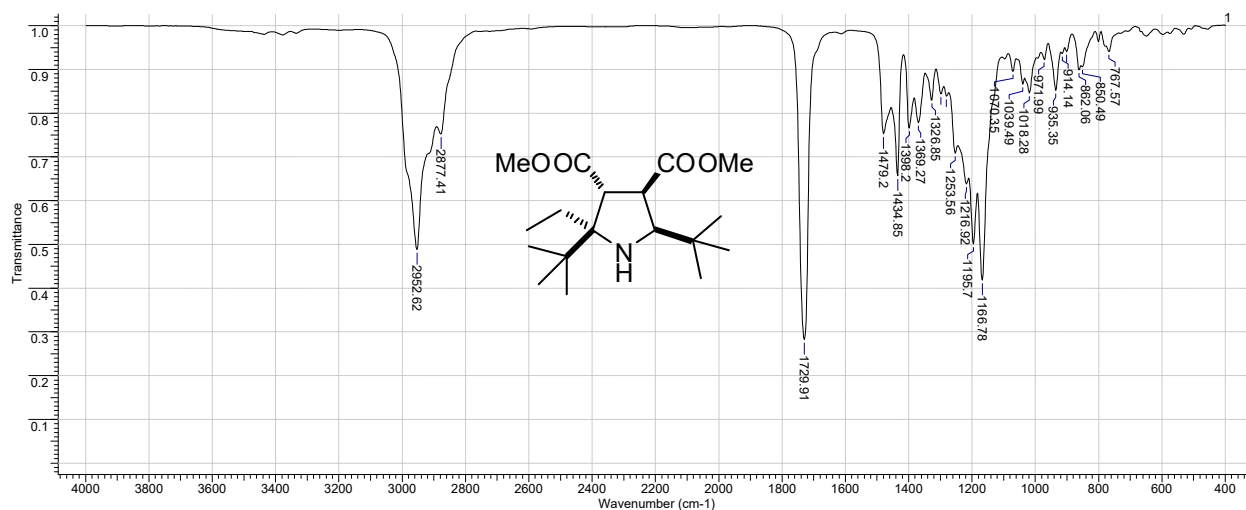**Figure S51.** IR (neat) of (2S(R),3R(S),4R(S),5R(S))-2,5-di-*tert*-butyl-3,4-bis(methoxycarbonyl)-2-ethylpyrrolidine (**9**)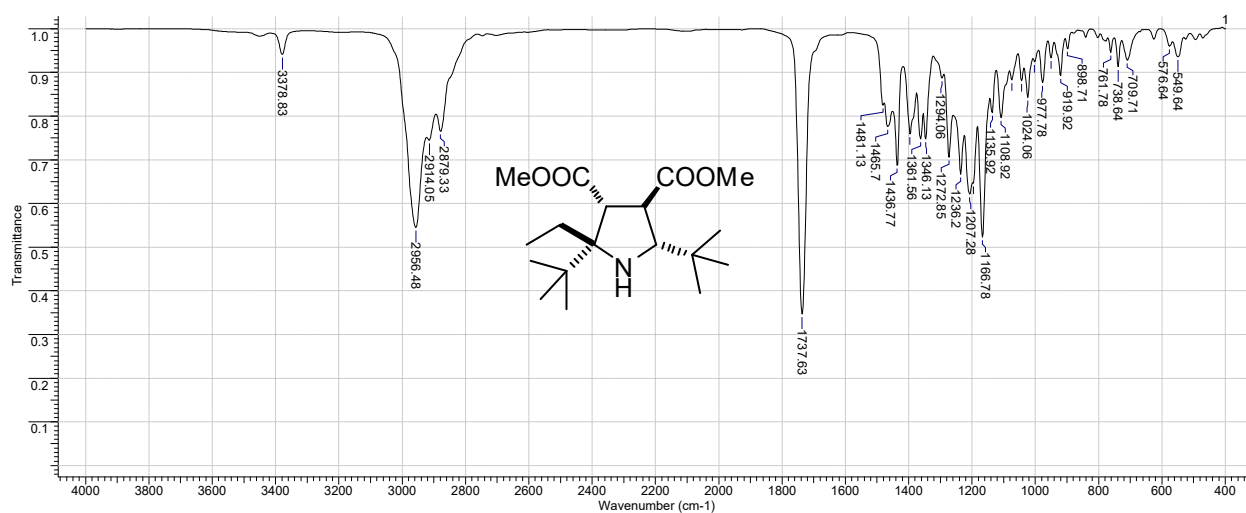**Figure S52.** IR (neat) of dimethyl 2-(1-((2,2-dimethylpentan-3-ylidene)amino)-2,2-dimethylpropyl)succinate (**10**)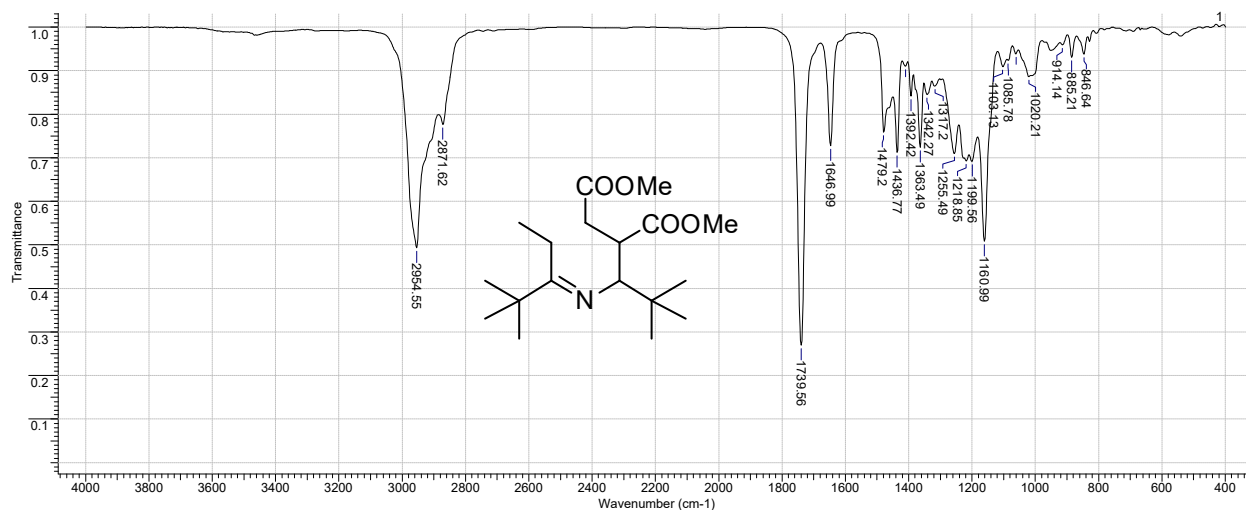

**Figure S53.** IR (KBr) of (2R(S),3R(S),4R(S),5S(R))-2,5-di-tert-butyl-3,4-bis(hydroxymethyl)-2-ethylpyrrolidine (**11**)

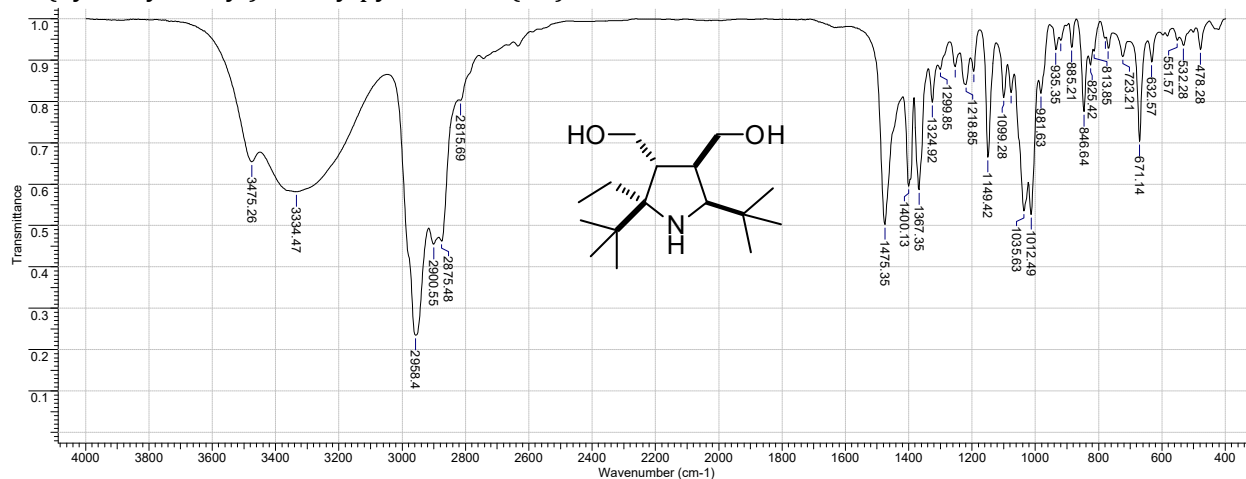

**Figure S54.** IR (KBr) of (2R(S),3R(S),4R(S))-2,5-di-tert-butyl-2-ethyl-3,4-bis(hydroxymethyl)-3,4-dihydro-2H-pyrrole 1-oxide (**12**)

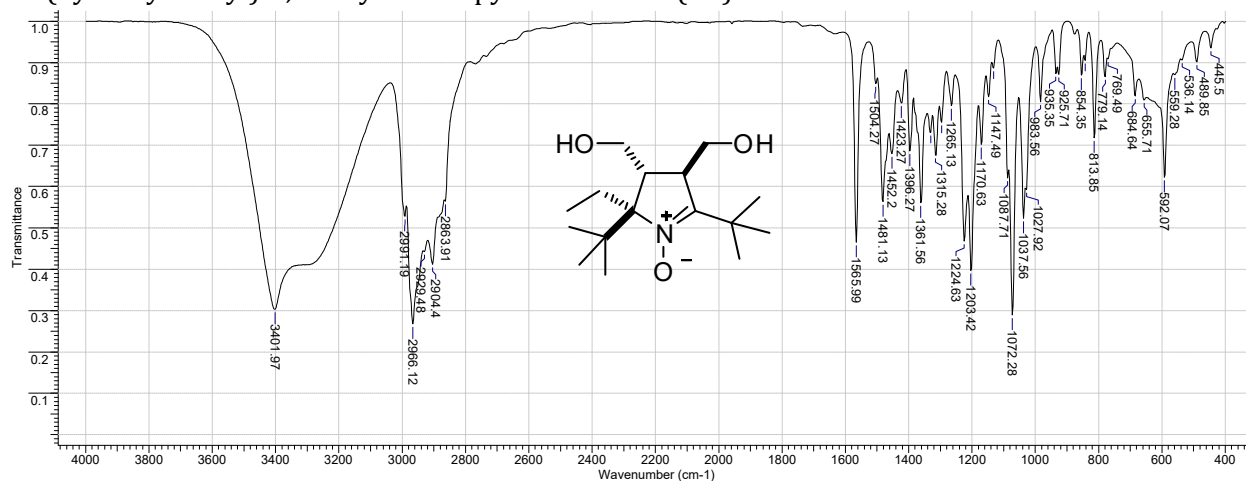

**Figure S55.** IR (KBr) of 2,2,5-Triethyl-5-tert-butyl-3,4-bis(hydroxymethyl)-pyrrolidine-1-oxyl (**1a**)

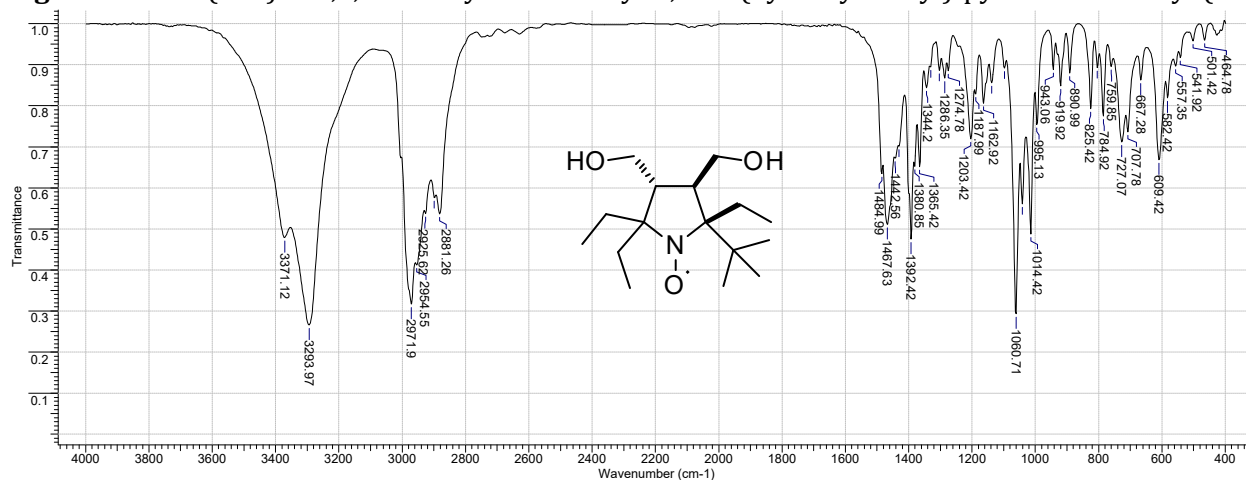



**Figure S56.** IR(KBr) of (2R(S),3R(S),4R(S))-2,5-di-*tert*-butyl-2-ethyl-3,4-bis(((2-methoxypropan-2-yl)oxy)methyl)-3,4-dihydro-2H-pyrrole 1-oxide (**14**)

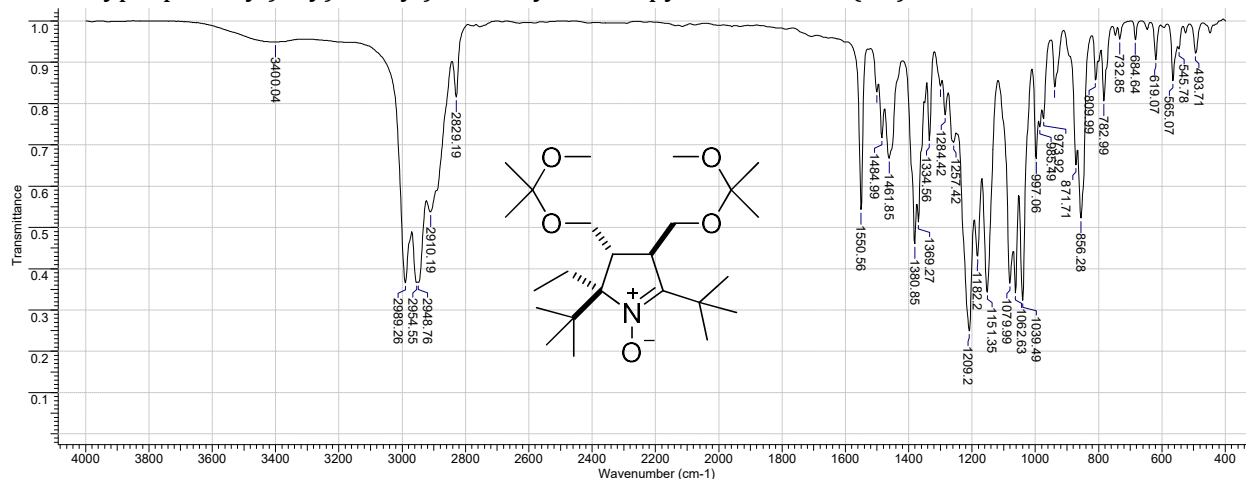

**Figure S57.** IR (neat) of (1S(R),4R(S),5R(S))-2,4-di-*tert*-butyl-4-ethyl-1-propyl-3-azabicyclo[3.1.0]hex-2-ene (**15**)

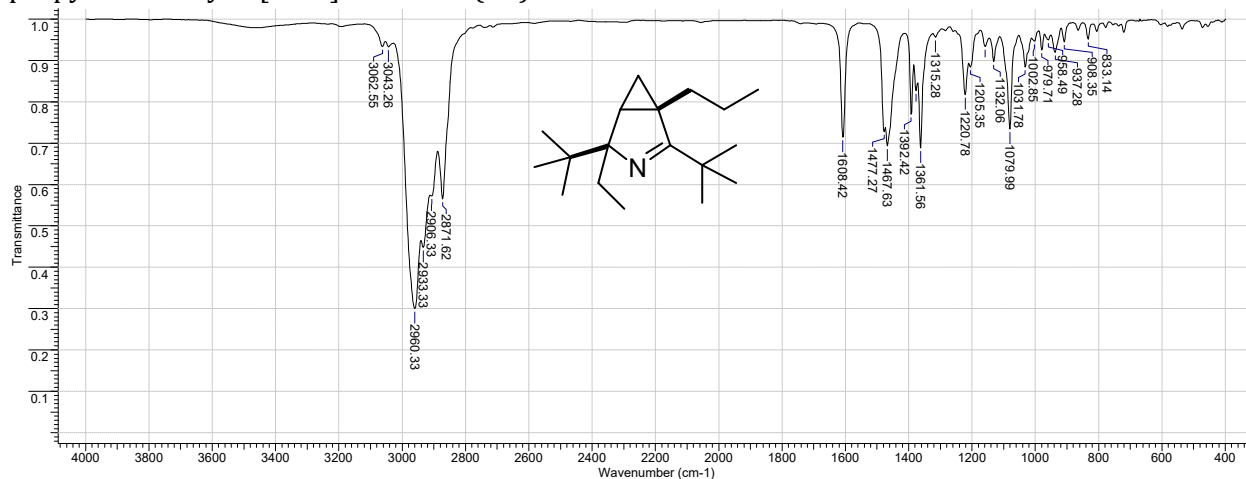

**Figure S58.** IR (neat) of (2S(R),3R(S),4R(S))-2,5-di-*tert*-butyl-2-ethyl-3,4-bis(methoxycarbonyl)-3,4-dihydro-2H-pyrrole 1-oxide (**16**)

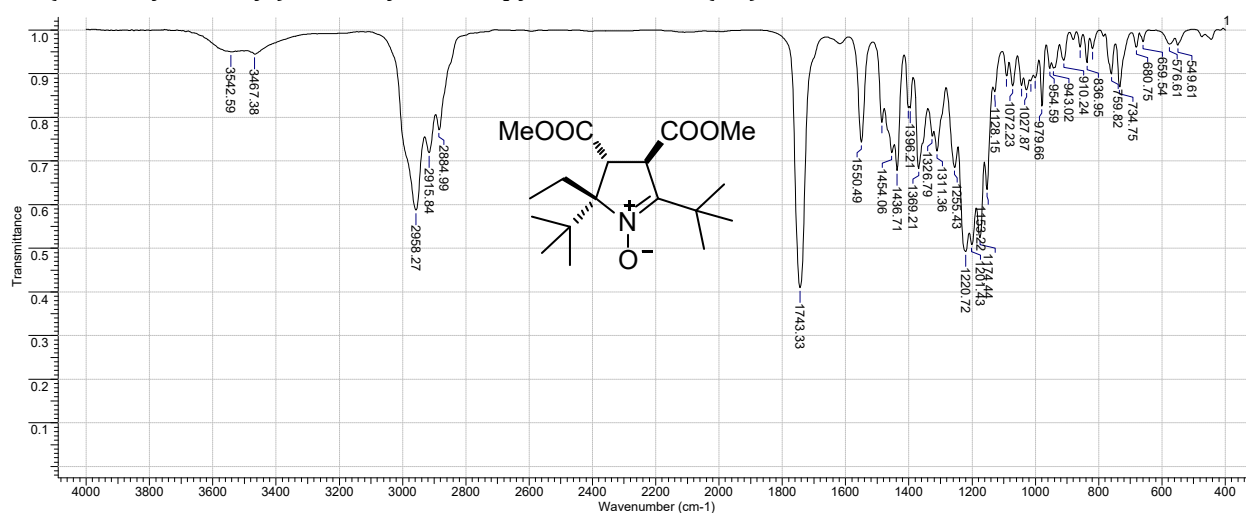

**Figure S59.** IR (KBr) of (2S(R),3R(S))-2,5-di-tert-butyl-2-ethyl-3-(methoxycarbonyl)-3,4-dihydro-2H-pyrrole 1-oxide (**17**)

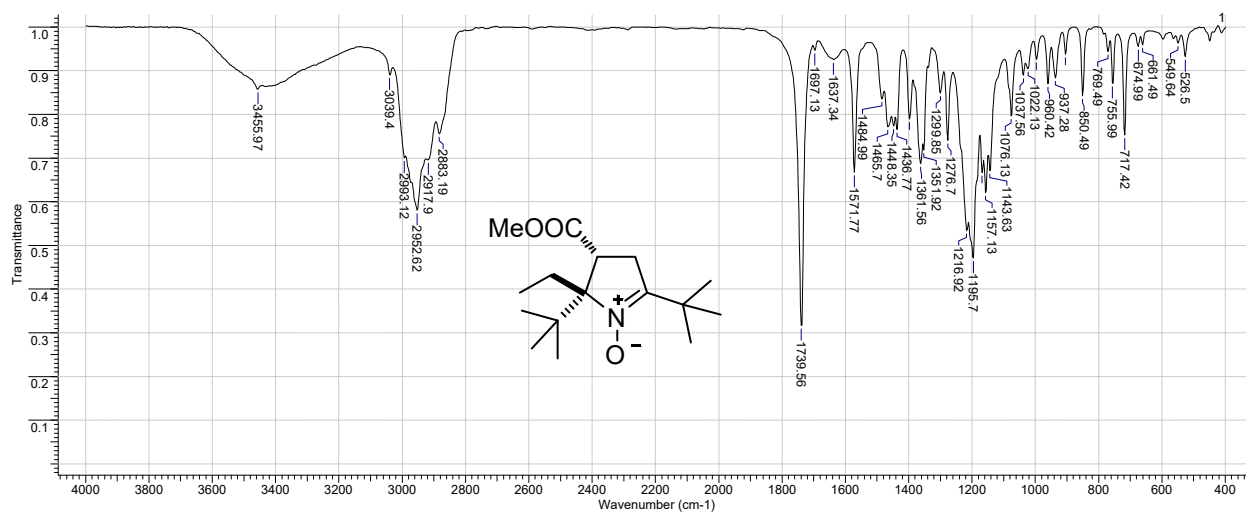

**Figure S60.** IR (KBr) of (2S(R),3S(R))-2,5-di-tert-butyl-2-ethyl-3-(methoxycarbonyl)-3,4-dihydro-2H-pyrrole 1-oxide (**18**)

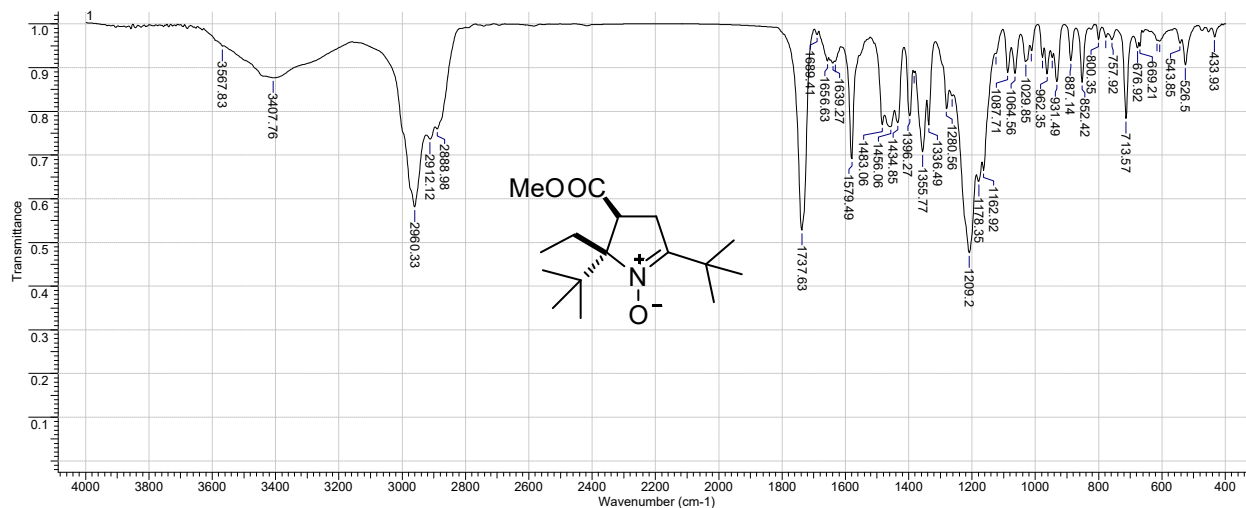

**Figure S61.** IR (KBr) of (2S(R),3R(S))-2,5-di-tert-butyl-2-ethyl-3-(hydroxymethyl)-3,4-dihydro-2H-pyrrole 1-oxide (**20**)

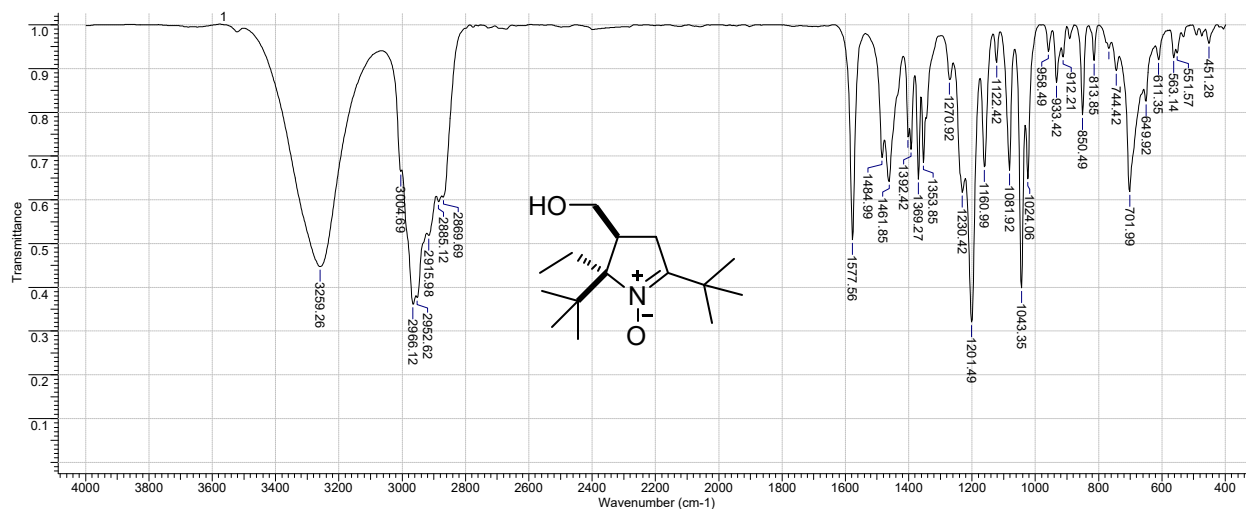

**Figure S62.** IR (KBr) of (2S(R),3S(R))-2,5-di-tert-butyl-2-ethyl-3-(hydroxymethyl)-3,4-dihydro-2H-pyrrole 1-oxide (**21**)

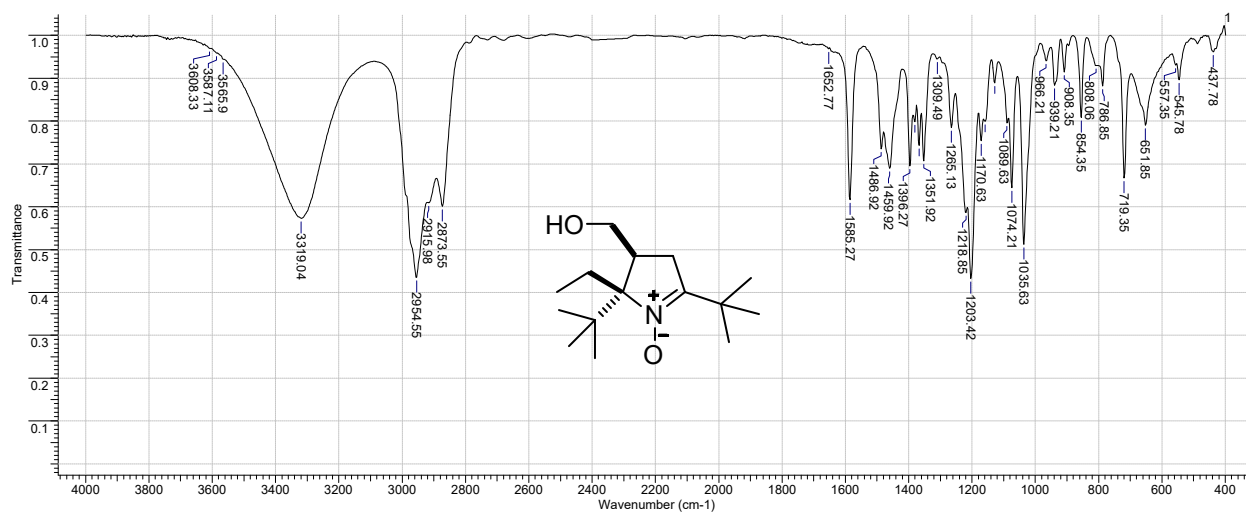

**Figure S63.** IR (neat) of (2S(R),3R(S))-2,5-di-tert-butyl-2,5-diethyl-3-(hydroxymethyl)pyrrolidin-1-oxyl (**23**)

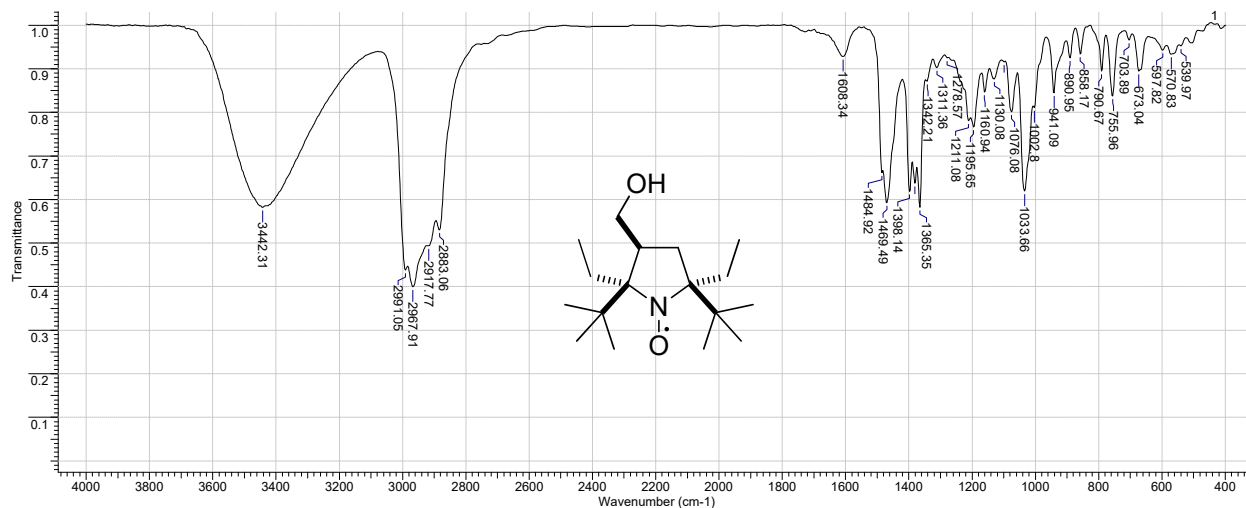

**Figure S64.** IR (neat) of (2S(R),3R(S),5S(R))-2,5-di-tert-butyl-3-(((3-(dimethylamino)propyl)carbamoyl)oxy)methyl)-2,5-diethylpyrrolidin-1-oxyl (**25**)

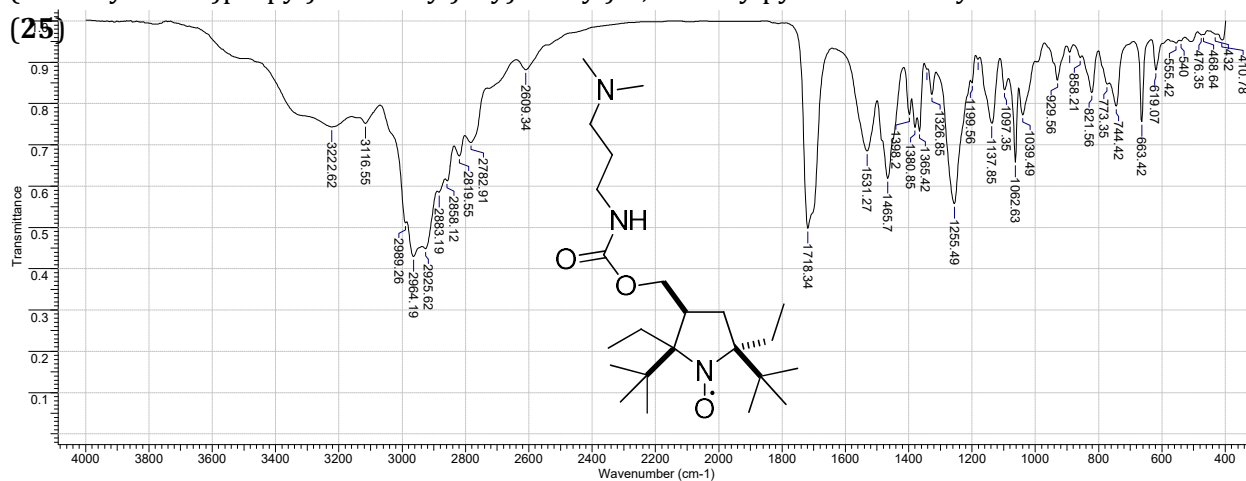

**Figure S65.** IR (neat) of mono((2*S*(R),3*R*(S),5*S*(R))-2,5-di-*tert*-butyl-2,5-diethyl-3-(((3-(trimethylammonio)propyl)carbamoyl)oxy)methyl)pyrrolidin-1-oxyl) monoiodide (**26**)

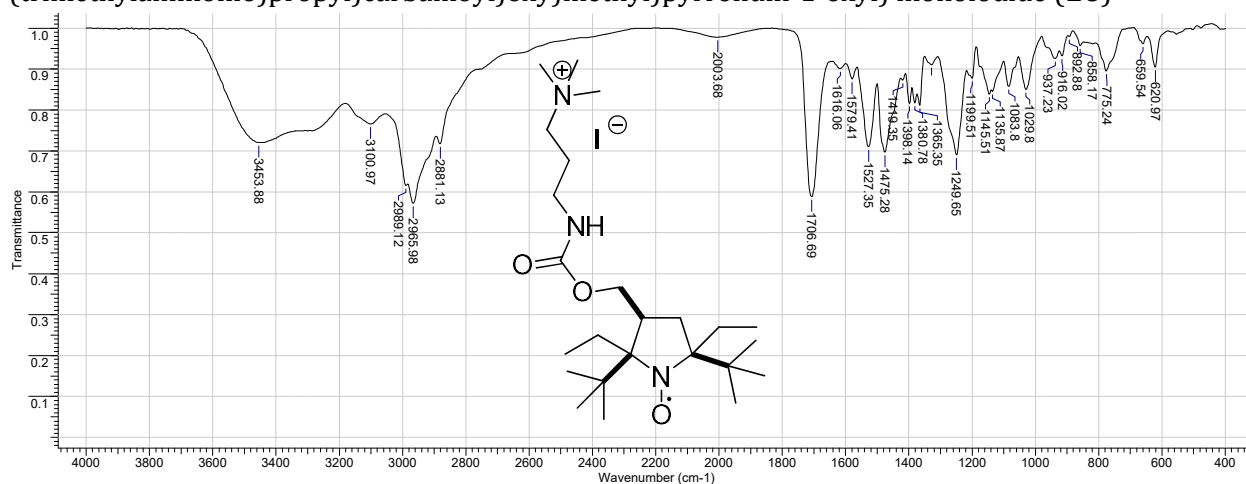

## XRD Data

Chemical structures of the molecules **20** and **21** obtained by X-ray single crystal diffractometry:

**Figure S66.** Crystal structure for (2*S*(R),3*R*(S))-2,5-di-*tert*-butyl-2-ethyl-3-(hydroxymethyl)-3,4-dihydro-2*H*-pyrrole 1-oxide (**20**)

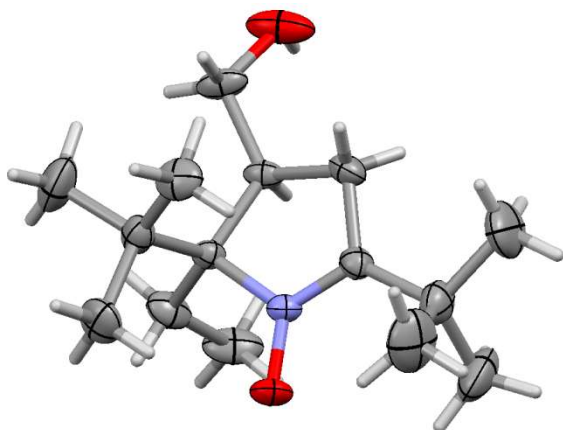

**Figure S67.** Crystal structure for (2*S*(R),3*S*(R))-2,5-di-*tert*-butyl-2-ethyl-3-(hydroxymethyl)-3,4-dihydro-2*H*-pyrrole 1-oxide (**21**)

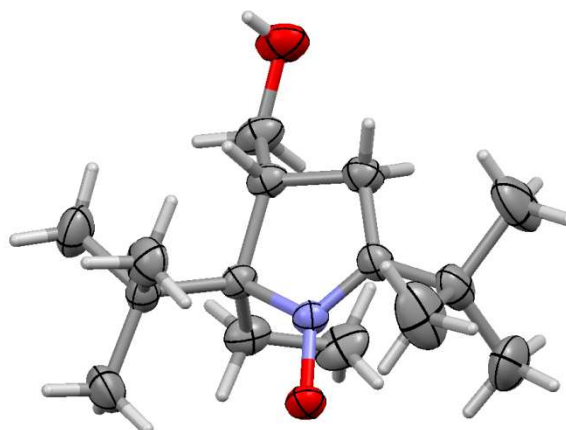

Crystal data **20**: C<sub>15</sub>H<sub>29</sub>NO<sub>2</sub>, M = 255.39, monoclinic, space group C2/c, at 296 K: a = 20.1597(14), b = 15.1070(10), c = 12.4016(7) Å, β = 119.835(2)°, V = 3276.3(4) Å<sup>3</sup>, Z = 8, d<sub>calc</sub> = 1.036 g·cm<sup>-3</sup>, μ = 0.067 mm<sup>-1</sup>, a total of 26540 (θ<sub>max</sub> = 28.02°), 3964 I unique (R<sub>int</sub> = 0.0623), 2877 [I > 2σ(I)], 170 parameters. GooF = 1.001, R<sub>1</sub> = 0.0887, wR<sub>2</sub> = 0.2676 [I > 2σ(I)], R<sub>1</sub> = 0.1107, wR<sub>2</sub> = 0.3048 (all data), max/min diff. peak 1.39/-0.32 e·Å<sup>-3</sup>. CCDC 2312570.

Crystal data **21**: C<sub>15</sub>H<sub>29</sub>NO<sub>2</sub>, M = 255.39, triclinic, space group P-1, at 296 K: a = 9.5627(8), b = 12.9565(13), c = 13.4896(14) Å, α = 85.641(4), β = 88.100(4), γ = 79.040(3)°, V = 1635.8(3) Å<sup>3</sup>, Z = 4, d<sub>calc</sub> = 1.037 g·cm<sup>-3</sup>, μ = 0.067 mm<sup>-1</sup>, a total of 16573 I (θ<sub>max</sub> = 25.21°), 5832 unique (R<sub>int</sub> = 0.0642), 3298 [I > 2σ(I)], 339 parameters. GooF = 1.015, R<sub>1</sub> = 0.0616, wR<sub>2</sub> = 0.1775 [I > 2σ(I)], R<sub>1</sub> = 0.1144, wR<sub>2</sub> = 0.2142 (all data), max/min diff. peak 0.34/-0.18 e·Å<sup>-3</sup>. CCDC 2312569.

## EPR Data

**Figure S68.** Reduction profiles of **1a** (0.2 mM) in anaerobic conditions in phosphate-citrate-borate buffer (5 mM, pH 7.4) in presence of GSH (5 mM) and ascorbate (200 (●), 300 (■) mM). The amplitude of the low-field component of the EPR spectrum was followed, spectrometer settings: frequency, 9.87 GHz; centerfield, 350.6 mT; sweep range, 10 mT; microwave power, 2.0 mW; modulation amplitude, 0.1 mT; time constant, 10.24 ms; and conversion time, 20.48 ms.

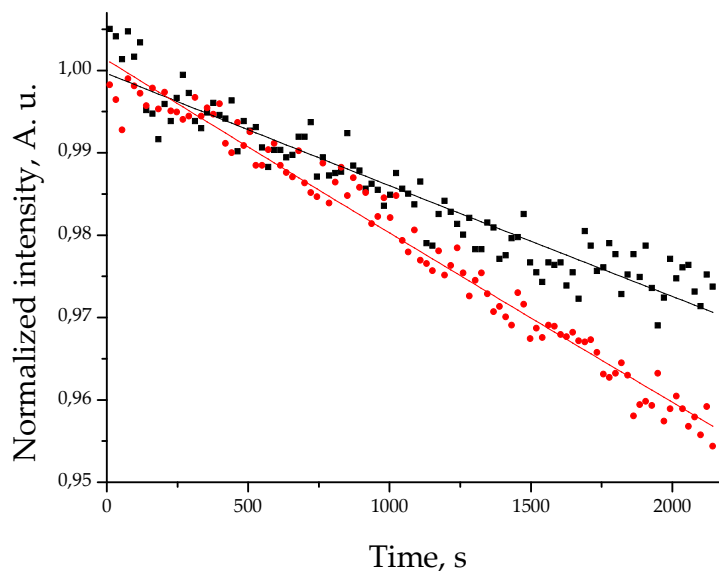

**Figure S69.** The plot of the nitroxide **1a** first order decay constant  $k_1$  versus ascorbate concentration and the linear fit corresponding to  $k_2 = (7.0 \pm 2 \times 10^{-5} \text{ M}^{-1} \text{ s}^{-1})$ .

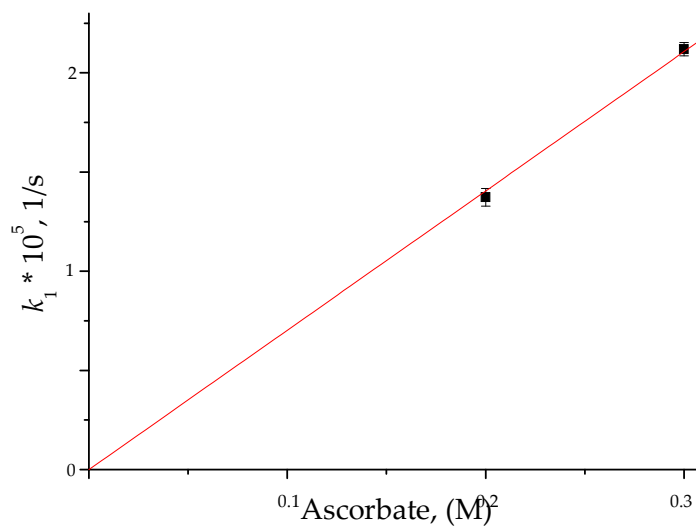

**Figure S70.** EPR spectrum of **26** (0.2 mM) in distilled water. Spectrometer settings: frequency, 9.87 GHz; microwave power, 5.0 mW; modulation amplitude, 0.05 mT; time constant, 50–100 ms; and conversion time, 5.12 ms.

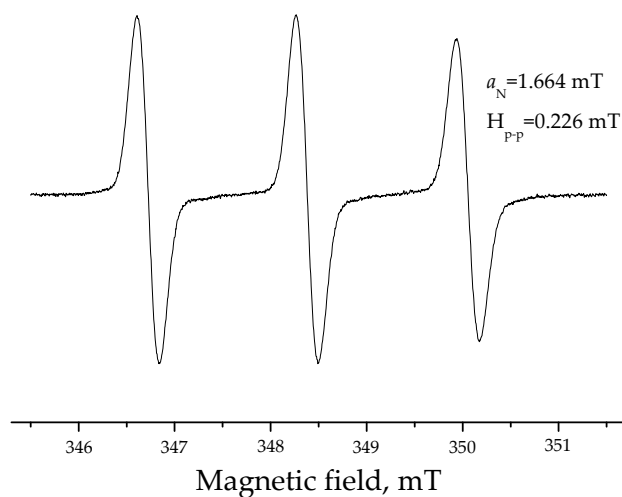

**Figure S71.** Reduction profiles of **26** (0.2 mM) in anaerobic conditions in phosphate-citrate-borate buffer (5 mM, pH 7.4) in presence of GSH (5 mM) and ascorbate (100 (●), 200 (■) and 300 (◆) mM). The amplitude of the low-field component of the EPR spectrum was followed, spectrometer settings: frequency, 9.87 GHz; centerfield, 350.6 mT; sweep range, 10 mT; microwave power, 2.0 mW; modulation amplitude, 0.1 mT; time constant, 10.24 ms; and conversion time, 20.48 ms.

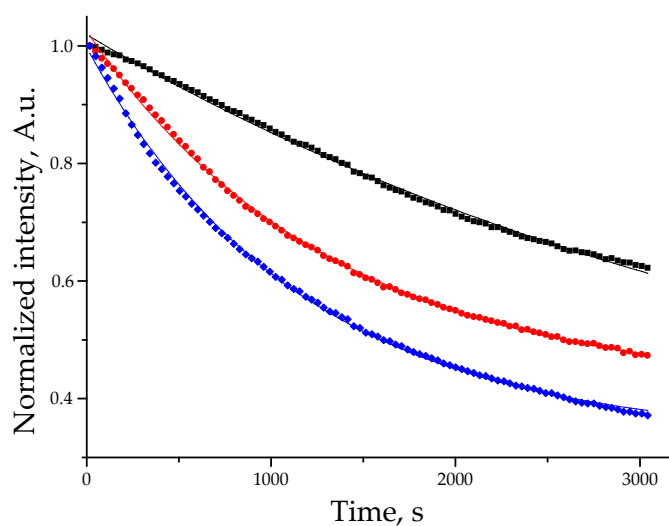

**Figure S72.** The plot of the nitroxide **26** first order decay constant  $k_1$  versus ascorbate concentration and the linear fit corresponding to  $k_2 = (2.0 \pm 0.1 \times) 10^{-3} \text{ M}^{-1}\text{s}^{-1}$ .

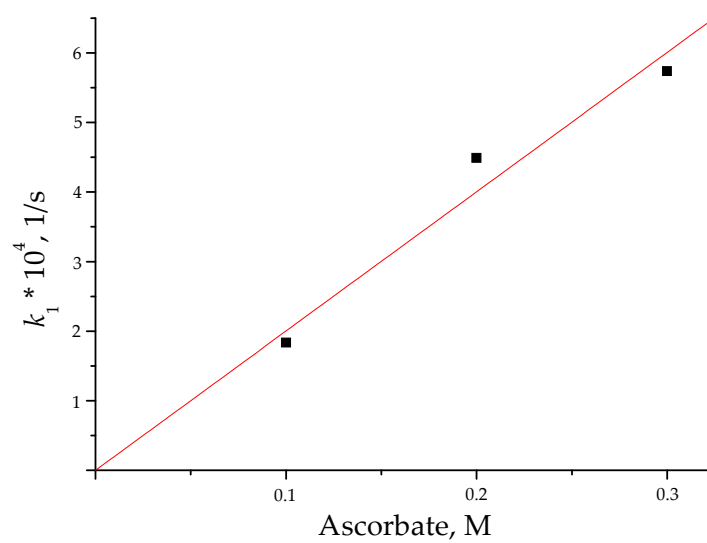

Supplement: s1 [file s1]
